# Supplementary material for: Macrocyclic Donor‐Acceptor Dyads Composed of Oligothiophene Half‐Cycles and Perylene Bisimides
Source: PubMed Central journal article supplement (PMC9323445; doi:10.1002/chem.202200355), 2022-04-12
Supplement: CHEM-28-0-s001.pdf [file CHEM-28-0-s001.pdf]

# Chemistry–A European Journal

Supporting Information

## **Macrocyclic Donor-Acceptor Dyads Composed of Oligothiophene Half-Cycles and Perylene Bisimides**

Kevin Bold, Matthias Stolte, Kazutaka Shoyama, Ana-Maria Krause, Alexander Schmiedel,  
Marco Holzapfel, Christoph Lambert,\* and Frank Würthner\*

## Table of Contents

|                                                            |     |
|------------------------------------------------------------|-----|
| Experimental Section .....                                 | S3  |
| Synthetic Procedure .....                                  | S8  |
| Possible Reaction Mechanism for the Macrocyclization ..... | S11 |
| Single Crystal X-ray Analysis .....                        | S13 |
| <sup>1</sup> H NMR Spectra Comparison .....                | S16 |
| Spectroelectrochemistry .....                              | S19 |
| Optical Properties in Cyclohexane .....                    | S23 |
| DFT and TDDFT calculations .....                           | S24 |
| Transient Absorption Spectra .....                         | S26 |
| NMR Spectra .....                                          | S30 |
| Mass Spectra .....                                         | S33 |
| Cartesian Coordinates Received from DFT Calculations ..... | S36 |
| Supporting References .....                                | S47 |

## Experimental Section

### General methods

All reactions were performed in standard glass equipment. All used chemicals were purchased from commercial suppliers (*abcr/carbolution chemicals, Acros Organics, Alfa Asear, Merck, Sigma Aldrich, TCI and VWR*) and applied without further purification. The synthesis of stannylated oligothiophenes **4**<sup>[S1]</sup>, **5**<sup>[S2]</sup> and **6**<sup>[S3]</sup> is literature known. The preparation of compound **3** and **5T-PBI**<sup>[S4]</sup> as well as reference oligothiophenes **4T-7T** and stannylated compound **7**<sup>[S5]</sup> were reported recently.

THF, CH<sub>2</sub>Cl<sub>2</sub>, and toluene were purified and dried with the commercial purification system PureSolv MD from *Innovative Technology*. The solvent *m*-xylene was dried over molecular sieves prior to use.

Flash column chromatography was performed on a PuriFLash XS-420 from *Interchim* using columns of the size 0025. The purification by gel permeation chromatography was performed on a *Shimadzu* (LC-20AD Prominence Pump, SPD-MA20A Prominence Diode Array Detector) with two preparative columns (*Japan Analytical Industries Co., Ltd*). Ethanol stabilised CHCl<sub>3</sub> (Chromasolv®, *Sigma Aldrich*) was used as eluent.

MALDI-TOF mass spectra were measured with an ultrafleXtreme from *Bruker Daltonics GmbH* using *trans*-2-[3-(4-*tert*-butylphenyl)-2-methyl-2-propenylidene]malono-nitrile (DCTB) as a matrix material.

<sup>1</sup>H and <sup>13</sup>C NMR spectra were recorded on a *Bruker Avance III HD 400 MHz* using deuterated solvents. <sup>13</sup>C NMR spectra are broad band proton decoupled. Chemical shifts ( $\delta$ ) are listed in parts per million (ppm) and are reported relative to tetramethyl silane (TMS). Coupling constants (*J*) are stated in Hertz (Hz). The spectra are referenced internally to residual proton solvent resonances or natural abundance carbon resonances. Multiplicities are reported as s = singlet, brs = broad singlet, d = doublet, dd = doublet of doublets, t = triplet, dt = doublet of triplets, q = quartet, quin = quintet, sex = sextet, m = multiplet with the chemical shift in the center of the signal.

UV/Vis absorption spectra were recorded with solutions of the compounds in cuvettes (SUPRASIL®, *Hellma® Analytix*) on a Jasco V-670 or V-770 spectrometer and fluorescence spectra on a FLS980-D2D2-ST fluorescence spectrometer (*Edinburgh Instruments*) and were corrected against the photomultiplier sensitivity and the lamp intensity.

Spectroelectrochemical experiments were performed on a Cary 5000 UV/Vis/NIR spectrometer from *Agilent* in combination with a sample compartment consisting of a custom-made cylindrical PTFE cell with a sapphire window and an adjustable three in one electrode (6 mm platinum disc working electrode, 1 mm platinum counter and Ag/AgCl leak free reference electrode) in reflection mode. The optical path was adjusted to 100  $\mu\text{m}$  with a micrometer screw. Potentials were applied with a reference potentiostat PAR 283 from *Princeton Applied Research*. Upon applying a new potential to the solution an equilibration time of 20 seconds between each measurement was employed.

The transient absorption spectrometer setup for the excitation at 530 nm is based on a femtosecond laser "Solstice" from *Newport-Spectra Physics* with a fundamental wavelength of 800 nm which provides 100 fs long pulses with a repetition rate of 1 kHz. This laser source was used to pump a NOPA to generate the excitation pulses at 530 nm with a pulse length <50 fs. The FWHM-bandwidth of the excitation pulse was 8.5 nm and the pulse energy was set to 20 nJ. Wire grid polarizers were used to set the pump pulse polarization to 54.7° in relation to the horizontal polarized white light continuum to achieve magic angle conditions. Another part of the laser beam was guided to a TOPAS-C from *Light-Conversion* to obtain a wavelength from 1000 nm, which was used to generate the probing white light continuum within a sapphire crystal. To achieve the probe range from 455 nm to 915 nm a dielectrically coated quartz glass short pass filter with 950 nm, thickness 3 mm, from *Edmund-Optics* were used. The sample was dissolved in spectroscopic grade  $\text{CH}_2\text{Cl}_2$  from ACROS organics and the solution was filled in a quartz glass cuvette with an optical path length of 2 mm. The optical density at the excitation wavelength was set to 0.34 for **4T-PBI**, 0.50 for **5T-PBI**<sup>[S4]</sup>, 0.32 for **6T-PBI** and 0.30 for **7T-PBI**. The IRF was 60-100 fs as

measured for stimulated Raman signals of the solvent. Further details on this spectrometer setup are provided in ref. [S6].

For the transient absorption spectrometer setup excitation at 400 nm the same laser source was used to pump a TOPAS to generate the excitation pulses at 400 nm with a pulse length <150 fs. The FWHM-bandwidth of the excitation pulse was 1.7 nm and the pulse energy was set to 20 nJ. Wire grid polarizers were used to set the pump pulse polarization to 54.7° in relation to the horizontal polarized white light continuum to achieve magic angle conditions. Another part of the laser beam was guided to a TOPAS-C from *Light-Conversion* to obtain a wavelength from 800 nm, which was used to generate the probing white light continuum within a 15 mm sapphire crystal. To achieve the probe range from 771 nm to 1501 nm a coloured glass filter with 850 nm from *Edmund-Optics* were used. The sample was dissolved in spectroscopic grade CH<sub>2</sub>Cl<sub>2</sub> from ACROS organics and the solution was filled in a quartz glass cuvette with an optical path length of 0.2 mm. The optical density at the excitation wavelength was set to 0.34 for **5T-PBI**. The IRF was >50 fs as measured for stimulated Raman signals of the solvent.

Cyclic and differential pulse voltammetry experiments were carried out with a *BASi* Epsilon potentiostat connected to a microcell apparatus from *rhd instruments* involving a 1.6 mL sample container, a platinum counter- and pseudo-reference electrode as well as a glassy carbon working electrode. The compounds were dissolved in CH<sub>2</sub>Cl<sub>2</sub> and Bu<sub>4</sub>NPF<sub>6</sub> was added as supporting electrolyte.

Single crystal X-ray diffraction data of **4T-PBI** were collected at 100 K on a Bruker D8 Quest Kappa Diffractometer using CuK<sub>α</sub>-radiation ( $\lambda = 1.54178 \text{ \AA}$ ) from an Incoatec I $\mu$ S microsource with Montel multi layered mirror with a Photon II CPAD detector. The structure was solved using direct methods, expanded with Fourier techniques and refined with the SHELX software package.<sup>[S7]</sup> All non-hydrogen atoms were refined anisotropically. Hydrogen atoms were included in the structure factor calculation on geometrically idealized positions. The compound **4T-PBI** crystallizes as red plates that scatter very weakly. Multiple attempts were made to grow better diffracting crystals. Crystals that are better suitable for single X-Ray diffraction studies were grown from

dibromomethane/*n*-hexane. However, the data yielded problems due to weak diffraction and disorder in the atom position of the side-chains and of the solvent. A large amount of disorder in the side chains and in the solvent was observed which made it difficult to model the chains and the solvent. Therefore restraints were applied to the atoms in the disorder. Alerts originated from the large amount of disorder in the side chains and in the solvent.

Single crystal X-ray diffraction data of **7T-PBI** were collected at the P11 beamline at DESY. The diffraction data were collected by a single 360° scan  $\phi$  sweep at 100 K. The diffraction data were indexed, integrated, and scaled using the XDS program package.<sup>[S8]</sup> The structures were solved using SHELXT,<sup>[S9]</sup> expanded with Fourier techniques and refined using the SHELX software package.<sup>[S10]</sup> Hydrogen atoms were assigned at idealized positions and were included in the calculation of structure factors. All non-hydrogen atoms in the main residue were refined anisotropically. The diffraction data had a resolution of ca. 1.5 Å (defined by the resolution shell with intensity  $I > 2\sigma$ ). For refinement diffraction data until 1.1 Å were used. In the crystal structure, the four crystallographic isomers found in the asymmetric unit cell were restrained by the SAME command of SHELX due to low resolution of diffraction data. All the alkyl substituents had heavy disorder and were modelled with constraints and restraints using standard SHELX commands RIGU, DELU, ISOR, SADI, DFIX, DANG, EADP, FLAT, CHIV, and SIMU. A similar set of commands were used to model solvents found in solvent accessible voids.

The diffraction of this crystal was not satisfactory for normal criteria of small molecule crystallography. This is due to the large molecular structure and thus large unit cell similar to those of macromolecular crystals. Nevertheless, diffraction data were good enough to elucidate the packing motif of this molecule and therefore solved with a resolution of ca. 1.6 Å. Diffraction data down to 1.1 Å were used for refinement and this treatment caused some A-level Alerts in the Checkcif routine. Due to cutoff of diffractions below 1.1 Å the data / parameter ratio needed to as low as 5.62. The weighted  $R$  factor ( $wR_2$ ) was high (0.47) due to inclusion of weakly diffracting data between 1.6 and 1.1 Å. Due to the low data / parameter ratio and disorder of solvent

molecules (chlorobenzene and methanol) the shift/error during the last step of refinement was as large as 0.65.

DFT and TD-DFT calculations were performed by Gaussian 16<sup>[S11]</sup> using B3LYP/6-31G(d) level of theory.

## Synthetic Procedure

### *Typical procedure for macrocyclization reactions*

A stirring solution of Pt-complex **3** (50.0 mg, 32.3  $\mu\text{mol}$ , 1.0 eq.) in degassed toluene (40 mL) was stirred and stannylated oligothiophene compounds (35.5  $\mu\text{mol}$ , 1.1 eq.) in degassed toluene (1.0 mL) were added dropwise *via* a syringe pump over 15 h. Then the reaction mixture was stirred overnight at 75 °C. The solvent was removed *in vacuo* and the crude residue was washed with *n*-hexane. The crude product was redissolved in degassed  $\text{CH}_2\text{Cl}_2$  (40 mL) and 1,1'-bis(diphenylphosphino)ferrocene (39.4 mg, 71.0  $\mu\text{mol}$ , 2.2 eq.) was added. The solution was stirred for 6 h at room temperature. The solvent was removed *in vacuo* and the residue was redissolved in degassed *m*-xylene (40 mL) and stirred overnight at 120 °C. The solvent was removed under reduced pressure and the crude product was purified *via* flash column chromatography ( $\text{CH}_2\text{Cl}_2/n\text{-hexane}$  = 1:1 to 1:0) and gel permeation chromatography ( $\text{CHCl}_3$ ) to give the desired compounds.



## 4T-PBI

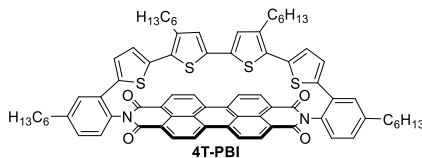

**Yield:** 5.29 mg, 4.39  $\mu\text{mol}$ , 14%, red solid. **<sup>1</sup>H NMR** (400 MHz, CD<sub>2</sub>Cl<sub>2</sub>):  $\delta$ /ppm = 8.68 (d, <sup>3</sup>J = 8.2 Hz, 4H), 8.64 (d, <sup>3</sup>J = 7.9 Hz, 4H), 7.69 (d, <sup>4</sup>J = 1.5 Hz, 2H), 7.51 (d, <sup>3</sup>J = 8.0 Hz, 2H), 7.47 (dd, <sup>3</sup>J = 8.0 Hz, <sup>4</sup>J = 1.9 Hz, 2H), 7.25 (d, <sup>3</sup>J = 3.8 Hz, 2H), 6.88 (d, <sup>3</sup>J = 3.8 Hz, 2H), 6.88 (s, 2H), 2.85 (t, <sup>3</sup>J = 7.7 Hz, 4H), 2.48 (t, <sup>3</sup>J = 7.7 Hz, 4H), 1.83 (quin, <sup>3</sup>J = 7.3 Hz, 4H), 1.22-1.51 (m, 28H), 0.98 (t, <sup>3</sup>J = 7.1 Hz, 6H), 0.87 (t, <sup>3</sup>J = 6.8 Hz, 6H). **<sup>13</sup>C NMR** (101 MHz, CD<sub>2</sub>Cl<sub>2</sub>):  $\delta$ /ppm = 164.3, 145.1, 142.0, 139.3, 135.8, 135.4, 132.2, 131.8, 130.1, 129.7, 129.2, 128.3, 127.0, 126.9, 126.8, 124.0, 132.8, 36.2, 32.2, 31.9, 31.8, 30.8, 29.6, 29.4, 29.2, 23.0, 22.9, 14.3, 14.2. **HRMS** (MALDI-TOF, positive mode, DCTB in CHCl<sub>3</sub>):  $m/z$  calculated for C<sub>76</sub>H<sub>72</sub>N<sub>2</sub>O<sub>4</sub>S<sub>4</sub> [M]<sup>+</sup>: 1204.4375, found: 1204.4369. **UV/Vis**  $\lambda_{\text{max}}$  ( $\epsilon_{\text{max}}$ ): CH<sub>2</sub>Cl<sub>2</sub>: 533 nm ( $67.5 \times 10^3$  L mol<sup>-1</sup> cm<sup>-1</sup>). **Fluorescence**  $\lambda_{\text{max}}$  ( $\lambda_{\text{ex}}$ ): Cyclohexane: 530 nm (480 nm), 530 nm (400 nm). **PLQY:**  $\Phi_{\text{fl}}$  = <1%. **R<sub>f</sub>:** 0.22 using CH<sub>2</sub>Cl<sub>2</sub> as eluent.

## 6T-PBI

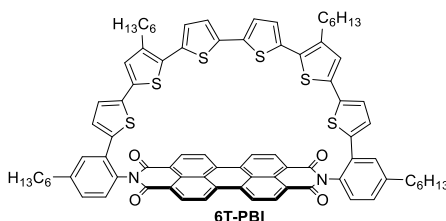

**Yield:** 5.85 mg, 4.27  $\mu\text{mol}$ , 13%, orange solid. **<sup>1</sup>H NMR** (400 MHz, CD<sub>2</sub>Cl<sub>2</sub>):  $\delta$ /ppm = 8.79 (d, <sup>3</sup>J = 8.21 Hz, 4H), 8.74 (d, <sup>3</sup>J = 7.9 Hz, 4H), 7.74 (d, <sup>4</sup>J = 1.9 Hz, 2H), 7.41 (d, <sup>3</sup>J = 4.0 Hz, 2H), 7.34 (dd, <sup>3</sup>J = 8.0 Hz, <sup>4</sup>J = 1.9 Hz, 2H), 7.23 (d, <sup>3</sup>J = 3.9 Hz, 2H), 7.17 (d, <sup>3</sup>J = 8.0 Hz, 2H), 7.14 (d, <sup>3</sup>J = 3.8 Hz, 2H), 7.08 (s, 2H), 6.94 (d, <sup>3</sup>J = 3.8 Hz, 2H), 2.80 (t, <sup>3</sup>J = 7.9 Hz, 4H), 2.70 (t, <sup>3</sup>J = 7.9 Hz, 4H), 1.78 (quin, <sup>3</sup>J = 7.2 Hz, 4H), 1.60 (quin, <sup>3</sup>J = 7.2 Hz, 4H), 1.45-1.25 (m, 24H), 0.94 (t, <sup>3</sup>J = 7.1 Hz,

6H), 0.86 (t,  $^3J = 7.1$  Hz, 6H).  $^{13}\text{C NMR}$  (101 MHz,  $\text{CD}_2\text{Cl}_2$ ):  $\delta/\text{ppm} = 164.3, 145.0, 141.4, 138.8, 138.1, 136.3, 135.8, 135.5, 135.0, 133.3, 132.3, 130.4, 130.2, 130.1, 129.7, 129.5, 129.4, 127.9, 127.4, 127.3, 126.3, 124.1, 124.1, 124.0, 123.7, 36.1, 32.2, 32.0, 31.7, 30.6, 29.6, 29.5, 23.1, 23.0, 14.3, 14.2$ . **HRMS** (MALDI-TOF, positive mode, DCTB in  $\text{CHCl}_3$ ):  $m/z$  calculated for  $\text{C}_{84}\text{H}_{76}\text{N}_2\text{O}_4\text{S}_6$   $[\text{M}]^+$ : 1368.4129, found: 1368.4124. **UV/Vis**  $\lambda_{\text{max}}$  ( $\epsilon_{\text{max}}$ ):  $\text{CH}_2\text{Cl}_2$ : 531 nm ( $67.2 \times 10^3 \text{ L mol}^{-1} \text{ cm}^{-1}$ ). **Fluorescence**  $\lambda_{\text{max}}$  ( $\lambda_{\text{ex}}$ ): Cyclohexane: 527 nm (480 nm), 533 nm (400 nm). **PLQY**:  $\Phi_{\text{fl}} = <1\%$ . **Rf**: 0.51 using  $\text{CH}_2\text{Cl}_2$  as eluent.

### 7T-PBI

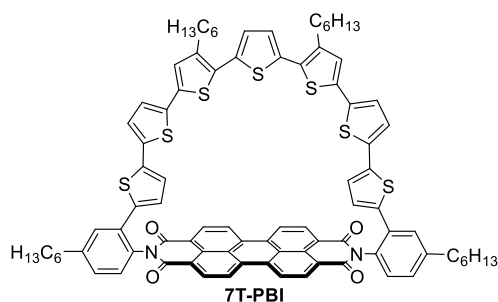

**Yield**: 1.49 mg, 1.03  $\mu\text{mol}$ , 3%, orange solid.  $^1\text{H NMR}$  (600 MHz,  $\text{CD}_2\text{Cl}_2$ ):  $\delta/\text{ppm} = 8.75$  (d,  $^3J = 8.4$  Hz, 4H), 8.71 (d,  $^3J = 7.9$  Hz, 4H), 7.54 (d,  $^4J = 1.8$  Hz, 2H), 7.39 (dd,  $^3J = 8.0$  Hz,  $^4J = 1.9$  Hz, 2H), 7.29 (d,  $^3J = 8.0$  Hz, 1H), 7.10 (d,  $^3J = 3.7$  Hz, 2H), 7.07 (s, 2H), ), 7.06 (d,  $^3J = 3.7$  Hz, 2H), 7.05 (s, 2H), 6.85 (d,  $^3J = 3.8$  Hz, 2H), 6.82 (d,  $^3J = 3.8$  Hz, 2H), 2.80 (t,  $^3J = 7.9$  Hz, 4H), 2.79 (t,  $^3J = 7.9$  Hz, 4H), 1.79 (quin,  $^3J = 7.6$  Hz, 4H), 1.69 (quin,  $^3J = 7.6$  Hz, 4H), 1.45-1.35 (m, 24H), 0.95 (t,  $^3J = 7.4$  Hz, 6H), 0.87 (t,  $^3J = 7.4$  Hz, 6H).  $^{13}\text{C NMR}$  (150 MHz,  $\text{CD}_2\text{Cl}_2$ ):  $\delta/\text{ppm} = 164.1, 145.2, 140.9, 139.9, 137.4, 136.7, 136.1, 136.0, 135.6, 135.0, 133.1, 132.3, 131.1, 131.0, 130.4, 130.3, 129.9, 129.4, 127.3, 126.2, 126.1, 125.7, 125.2, 125.1, 123.9, 123.7, 123.6, 36.1, 32.2, 32.1, 31.7, 30.5, 30.1, 29.8, 29.6, 23.1, 23.0, 14.3, 14.2$ . **HRMS** (MALDI-TOF, positive mode, DCTB in  $\text{CHCl}_3$ ):  $m/z$  calculated for  $\text{C}_{88}\text{H}_{78}\text{N}_2\text{O}_4\text{S}_7$   $[\text{M}]^+$ : 1450.4007, found: 1450.4001. **UV/Vis**  $\lambda_{\text{max}}$  ( $\epsilon_{\text{max}}$ ):  $\text{CH}_2\text{Cl}_2$ : 529 nm ( $69.2 \times 10^3 \text{ L mol}^{-1} \text{ cm}^{-1}$ ). **Fluorescence**  $\lambda_{\text{max}}$  ( $\lambda_{\text{ex}}$ ): Cyclohexane: 527 nm (480 nm), 527 nm (400 nm). **PLQY**:  $\Phi_{\text{fl}} = <1\%$ . **Rf**: 0.30 using  $\text{CH}_2\text{Cl}_2$  as eluent.

## Possible Reaction Mechanism for the Macrocyclization

A possible reaction mechanism starting with Pt-complex **3** for the final macrocyclization reaction is shown exemplarily for **4T-PBI** below (Figure S1). All proposed reaction intermediates (**IN1-IN4**) were not isolated.

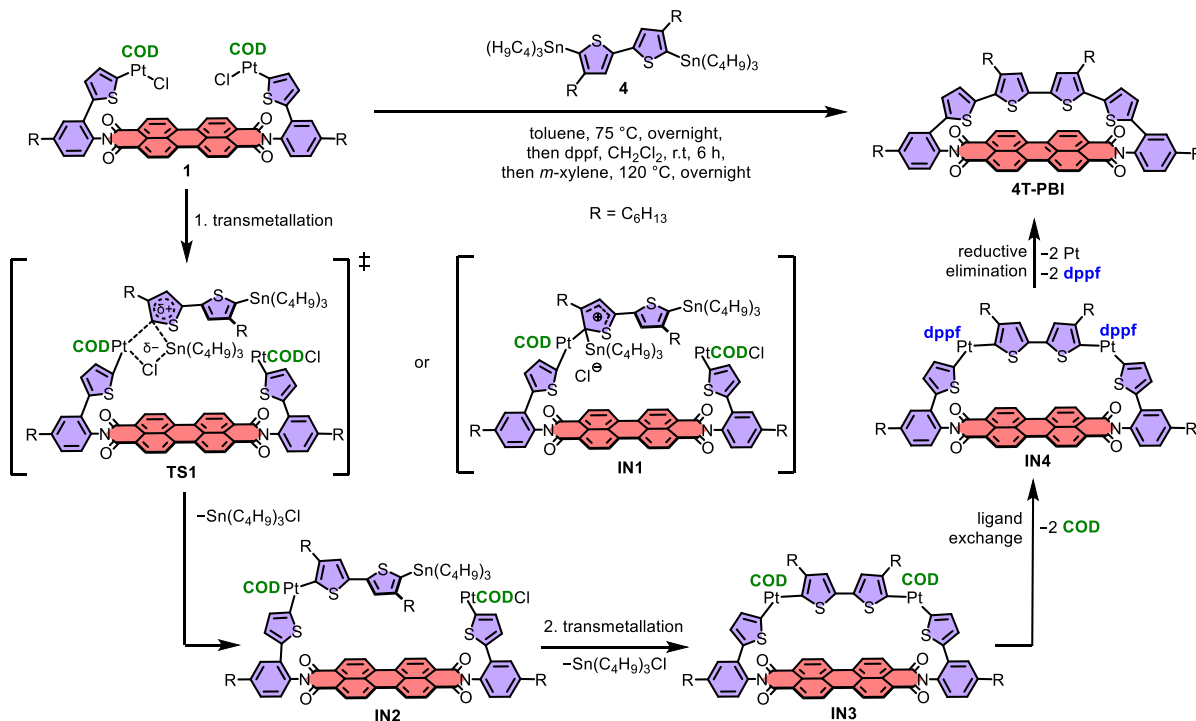

**Figure S1.** Proposed reaction mechanism for the representative formation of **4T-PBI** starting from Pt-complex **3**.

The addition of stannylated bithiophene **4** to Pt-precursor **3** leads to one *inter-* (**IN2**) and one *intramolecular* (**IN3**) transmetallation. As proposed by Eaborn *et al.*<sup>[S12]</sup> for similar complex formations of  $\text{PtCODCl}_2$  with aryl stannanes, this is presumably either achieved *via* a four-centre transition state **TS1** or a Wheland like intermediate **IN1**. This reaction step is conducted under *pseudo* high dilution conditions to favour the desired *intramolecular* Pt-complex formation after the first transmetallation. It is unknown whether both transmetallation steps proceed in a concerted way or stepwise. Concerning the conformation of the oligothiophene chain, most likely a *cis*-orientation is already present at the Pt-complex step (**IN3**) in order to accommodate for the square-planar Pt-complex geometry and sterical demand of the attached hexyl chains R.

Next, a ligand COD-dppf exchange reaction yields **IN4**. The dppf ligand is utilized to

facilitate the subsequent reductive elimination which was demonstrated for *cis*-Pt-(ArAr') complexes.<sup>[S13]</sup> This last step is conducted at elevated temperatures of 120 °C to initiate the thermally induced reductive elimination.<sup>[S14]</sup>

## Single Crystal X-ray Analysis

Table S1. Crystal data and structure refinement for **4T-PBI** (CCDC2143611).

|                                        |                                                                                                                                                |
|----------------------------------------|------------------------------------------------------------------------------------------------------------------------------------------------|
| Empirical formula                      | $C_{77}H_{74}Br_2N_2O_4S_4$                                                                                                                    |
| Formula weight                         | 1379.44 g/mol                                                                                                                                  |
| Temperature                            | 100(2) K                                                                                                                                       |
| Wavelength                             | 1.54178 Å                                                                                                                                      |
| Crystal system                         | Triclinic                                                                                                                                      |
| Space group                            | $P\bar{1}$                                                                                                                                     |
| Unit cell dimensions                   | $a = 8.0721(3)$ Å $\alpha = 91.307(2)^\circ$<br>$b = 19.3157(6)$ Å $\beta = 97.059(2)^\circ$<br>$c = 21.4211(7)$ Å $\gamma = 101.619(2)^\circ$ |
| Volume                                 | 3242.81(19) Å <sup>3</sup>                                                                                                                     |
| Z                                      | 2                                                                                                                                              |
| Density (calculated)                   | 1.413 g/cm <sup>3</sup>                                                                                                                        |
| Absorption coefficient                 | 3.208 mm <sup>-1</sup>                                                                                                                         |
| $F(000)$                               | 1432                                                                                                                                           |
| Crystal size                           | 0.158 × 0.064 × 0.020 mm                                                                                                                       |
| Theta range for data collection        | 2.338 to 72.465 °                                                                                                                              |
| Index ranges                           | $-9 \leq h \leq 9$ , $-23 \leq k \leq 23$ , $-26 \leq l \leq 26$                                                                               |
| Reflections collected                  | 87488                                                                                                                                          |
| Independent reflections                | 12757 [ $R_{\text{int}} = 0.0531$ ]                                                                                                            |
| Completeness to theta = 67.679 °       | 99.9%                                                                                                                                          |
| Absorption correction                  | Semi-empirical from equivalents                                                                                                                |
| Refinement method                      | Full-matrix least-squares on $F^2$                                                                                                             |
| Data / restraints / parameters         | 12757 / 296 / 914                                                                                                                              |
| Goodness-of-fit on $F^2$               | 1.031                                                                                                                                          |
| Final $R$ indices [ $I > 2\sigma(I)$ ] | $R_1 = 0.0840$ , $wR_2 = 0.2460$                                                                                                               |
| $R$ indices (all data)                 | $R_1 = 0.0947$ , $wR_2 = 0.2585$                                                                                                               |
| Extinction coefficient                 | n/a                                                                                                                                            |
| Largest diff. peak and hole            | 1.373 and $-1.420$ e·Å <sup>-3</sup>                                                                                                           |

**Table S2.** Crystal data and structure refinement for **7T-PBI** (CCDC2143364).

|                                                        |                                                                                                                                                           |
|--------------------------------------------------------|-----------------------------------------------------------------------------------------------------------------------------------------------------------|
| Empirical formula                                      | C <sub>400.63</sub> H <sub>312</sub> Cl <sub>3.40</sub> N <sub>8</sub> O <sub>44.25</sub> S <sub>28</sub>                                                 |
| Formula weight                                         | 6964.24 g/mol                                                                                                                                             |
| Temperature                                            | 100(2) K                                                                                                                                                  |
| Wavelength                                             | 0.61992 Å                                                                                                                                                 |
| Crystal system                                         | Monoclinic                                                                                                                                                |
| Space group                                            | <i>P</i> 2 <sub>1</sub> / <i>n</i>                                                                                                                        |
| Unit cell dimensions                                   | $a = 16.717(19) \text{ \AA}$ $\alpha = 90^\circ$<br>$b = 57.42(5) \text{ \AA}$ $\beta = 90.59(4)^\circ$<br>$c = 37.86(4) \text{ \AA}$ $\gamma = 90^\circ$ |
| Volume                                                 | 36340(65) Å <sup>3</sup>                                                                                                                                  |
| <i>Z</i>                                               | 4                                                                                                                                                         |
| Density (calculated)                                   | 1.273 g/cm <sup>3</sup>                                                                                                                                   |
| Absorption coefficient                                 | 0.179 mm <sup>-1</sup>                                                                                                                                    |
| <i>F</i> (000)                                         | 14526.1                                                                                                                                                   |
| Crystal size                                           | 0.100 × 0.100 × 0.050 mm <sup>3</sup>                                                                                                                     |
| Theta range for data collection                        | 0.562 to 16.367°.                                                                                                                                         |
| Index ranges                                           | -15 ≤ <i>h</i> ≤ 15, -52 ≤ <i>k</i> ≤ 52, -34 ≤ <i>l</i> ≤ 34                                                                                             |
| Reflections collected                                  | 200878                                                                                                                                                    |
| Independent reflections                                | 28320 [ <i>R</i> <sub>int</sub> = 0.1509]                                                                                                                 |
| Completeness to theta = 16.367°                        | 99.0%                                                                                                                                                     |
| Absorption correction                                  | None                                                                                                                                                      |
| Refinement method                                      | Full-matrix least-squares on <i>F</i> <sup>2</sup>                                                                                                        |
| Data / restraints / parameters                         | 28320 / 10992 / 5088                                                                                                                                      |
| Goodness-of-fit on <i>F</i> <sup>2</sup>               | 1.327                                                                                                                                                     |
| Final <i>R</i> indices    [ <i>I</i> > 2σ( <i>I</i> )] | <i>R</i> <sub>1</sub> = 0.1568, <i>wR</i> <sub>2</sub> = 0.3885                                                                                           |
| <i>R</i> indices (all data)                            | <i>R</i> <sub>1</sub> = 0.2946, <i>wR</i> <sub>2</sub> = 0.4729                                                                                           |
| Extinction coefficient                                 | n/a                                                                                                                                                       |
| Largest diff. peak and hole                            | 0.563 and -0.271 e·Å <sup>-3</sup>                                                                                                                        |

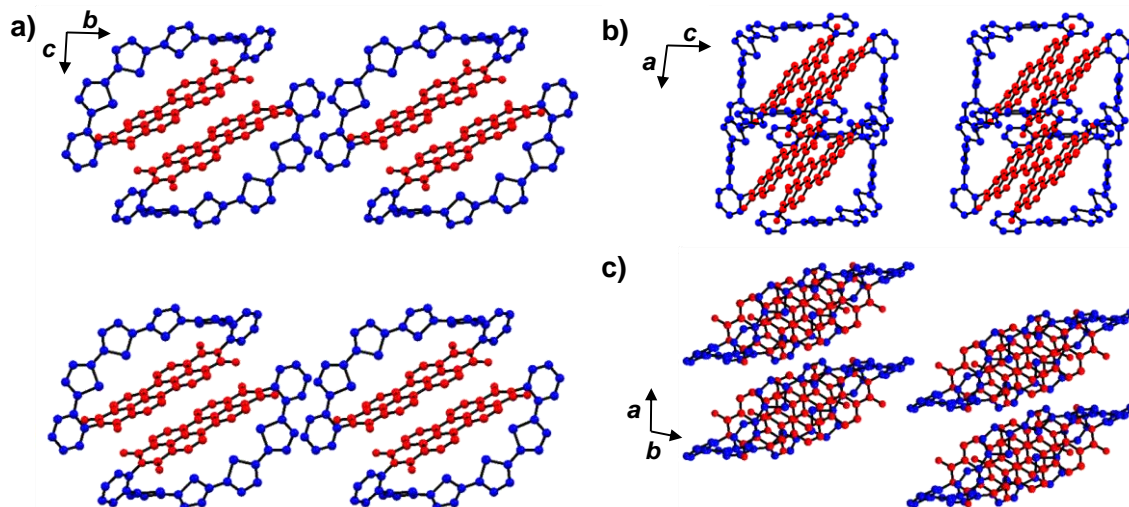

**Figure S2.** Crystal packing of **4T-PBI** seen along the a) *a*-, b) *b*-, and c) *c*-axes, respectively. PBI chromophores are coloured in red and the oligothiophene bridges in blue. Disordered aliphatic chains as well as solvent molecules were omitted for clarity.

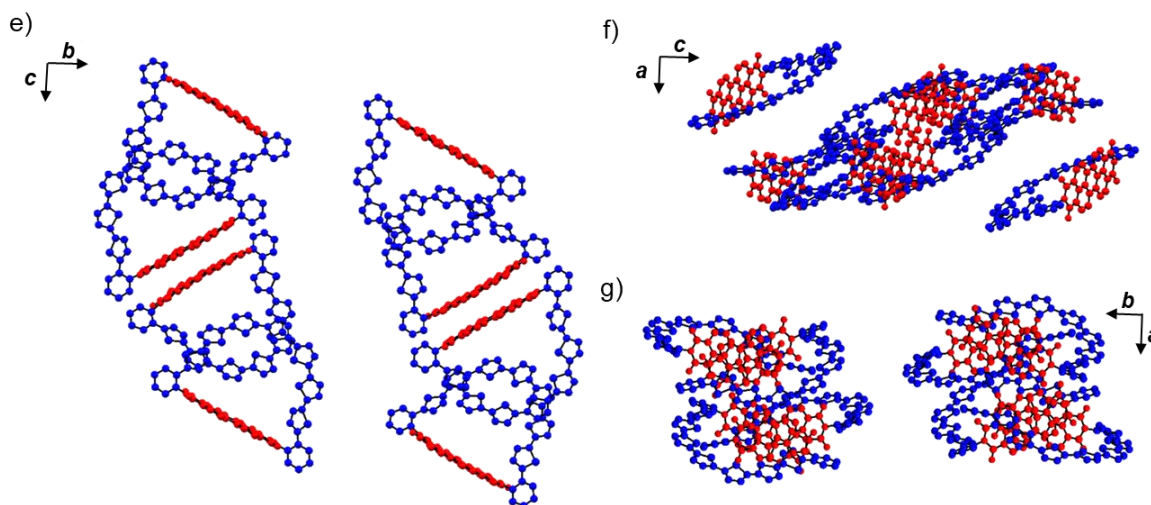

**Figure S3.** Crystal packing of **7T-PBI** seen along the a) *a*-, b) *b*-, and c) *c*-axes, respectively. PBI chromophores are coloured in red, the oligothiophene bridges in blue. Disordered aliphatic chains as well as solvent molecules were omitted for clarity.

## $^1\text{H}$ NMR Spectra Comparison

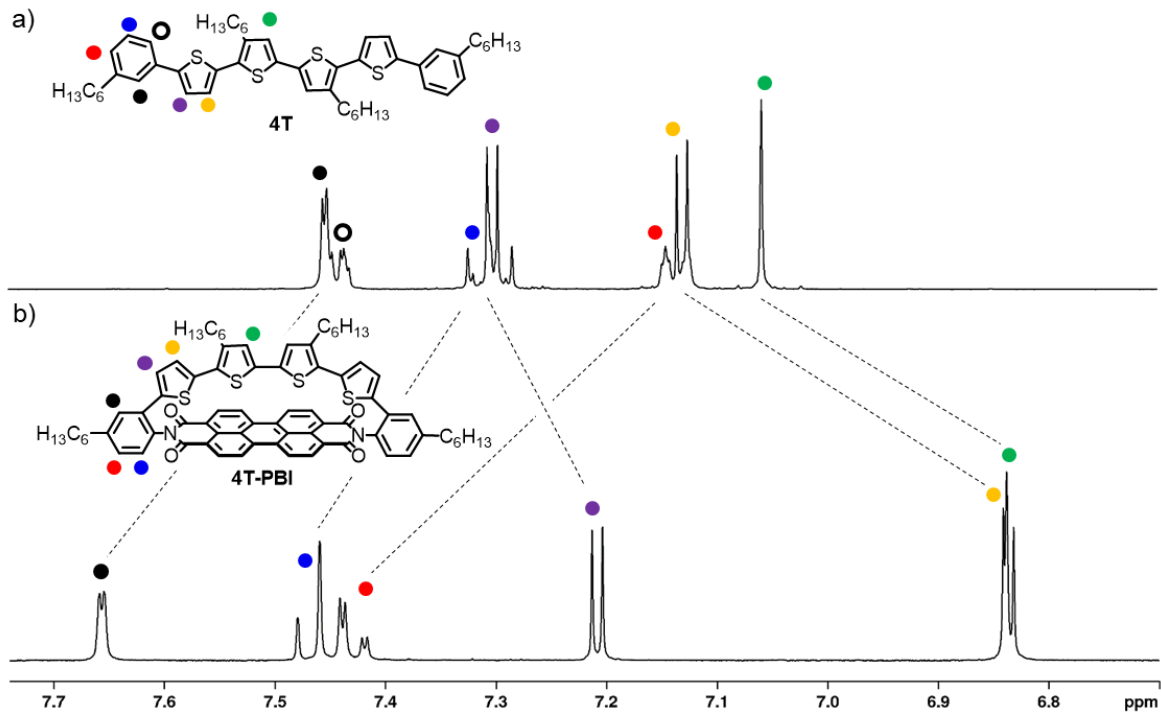

**Figure S4.** Excerpt of the  $^1\text{H}$  NMR spectra of a) oligothiophene moiety **4T**<sup>[S5]</sup> and b) **4T-PBI** in  $\text{CD}_2\text{Cl}_2$  at room temperature.

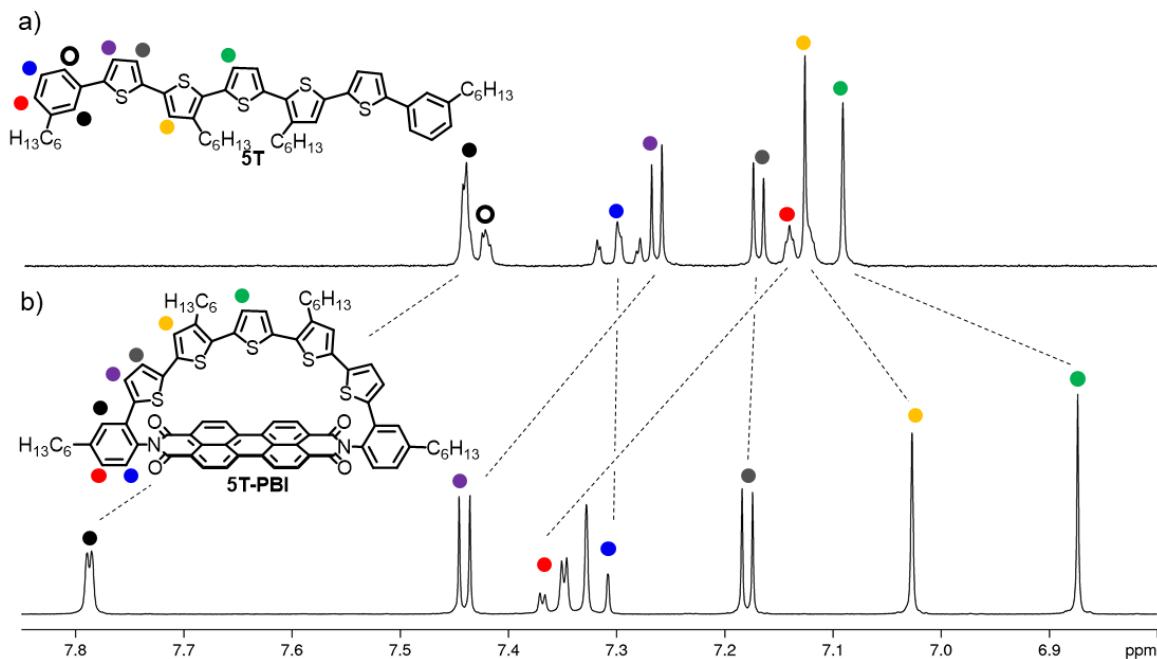

**Figure S5.** Excerpt of the  $^1\text{H}$  NMR spectra of a) oligothiophene moiety **5T**<sup>[S5]</sup> and b) **5T-PBI**<sup>[S4]</sup> in  $\text{CD}_2\text{Cl}_2$  at room temperature.



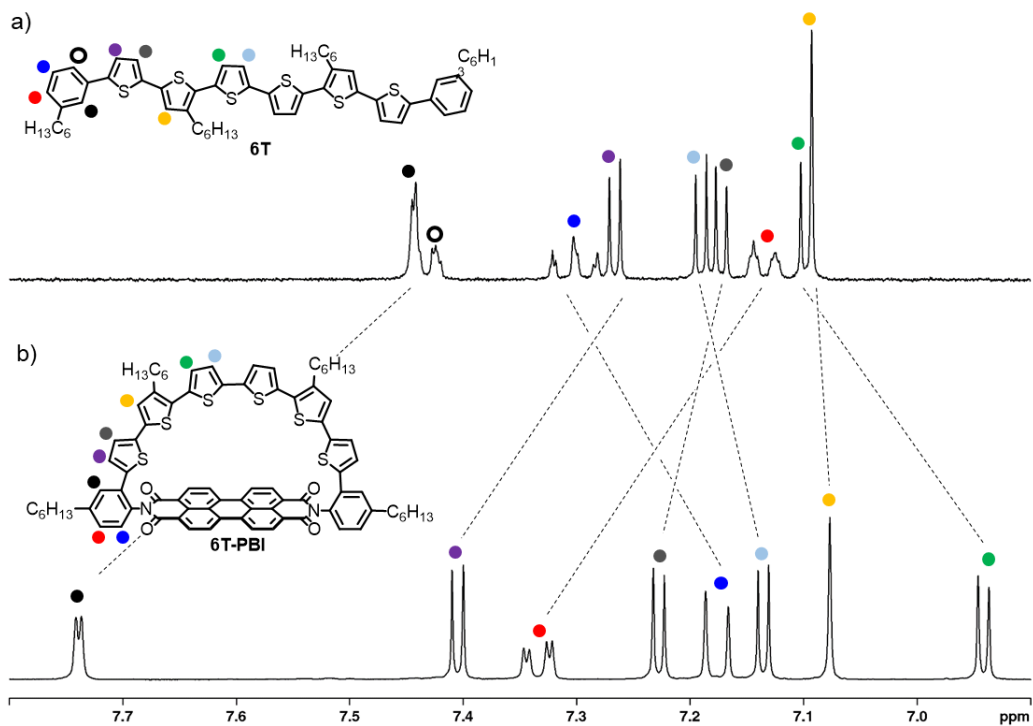

**Figure S6.** Excerpt of the  $^1\text{H}$  NMR spectra of a) oligothiophene moiety  $6\text{T}^{[\text{S5}]}$  and b)  $6\text{T-PBI}$  in  $\text{CD}_2\text{Cl}_2$  at room temperature.

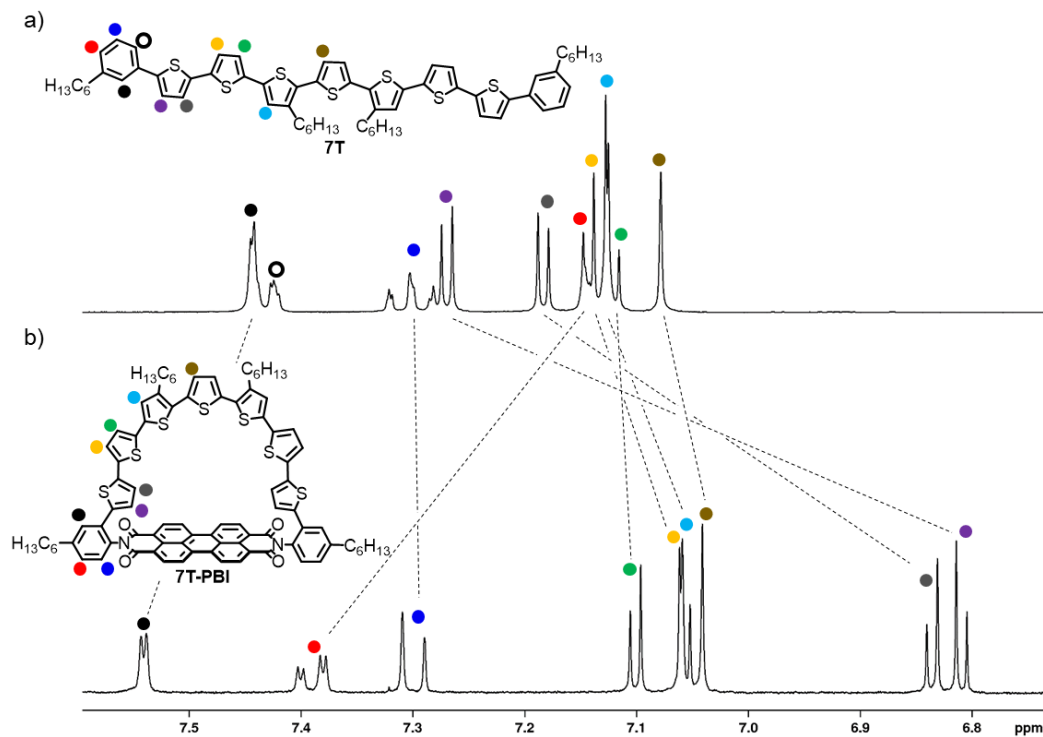

**Figure S7.** Excerpt of the  $^1\text{H}$  NMR spectra of a) oligothiophene moiety  $7\text{T}^{[\text{S5}]}$  and b)  $7\text{T-PBI}$  in  $\text{CD}_2\text{Cl}_2$  at room temperature.

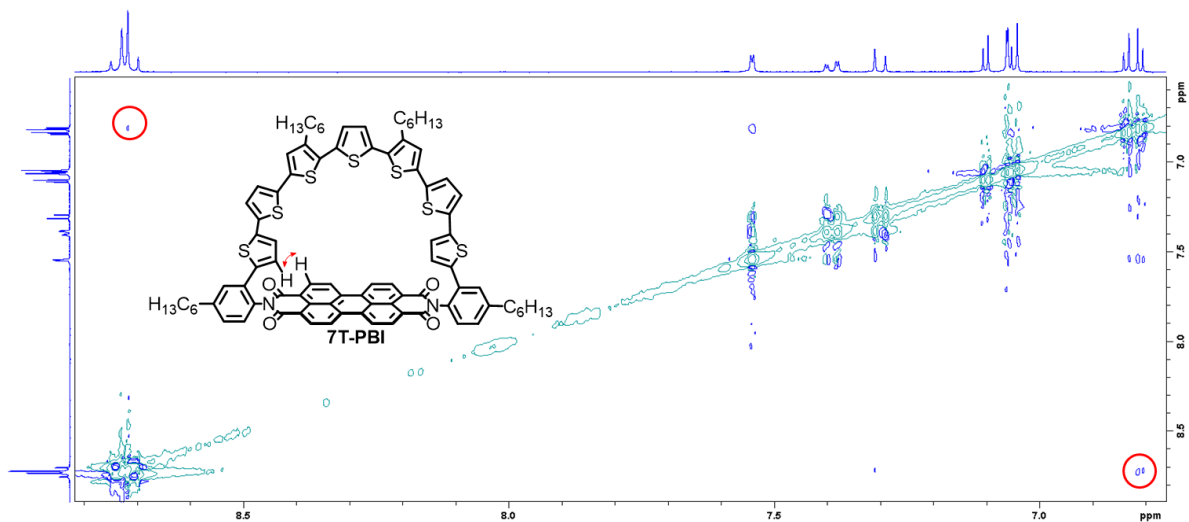

**Figure S8.** Excerpt of the ROESY spectrum of **7T-PBI** in  $\text{CD}_2\text{Cl}_2$  at room temperature. The thiophene and PBI proton cross signals are highlighted by red circles.

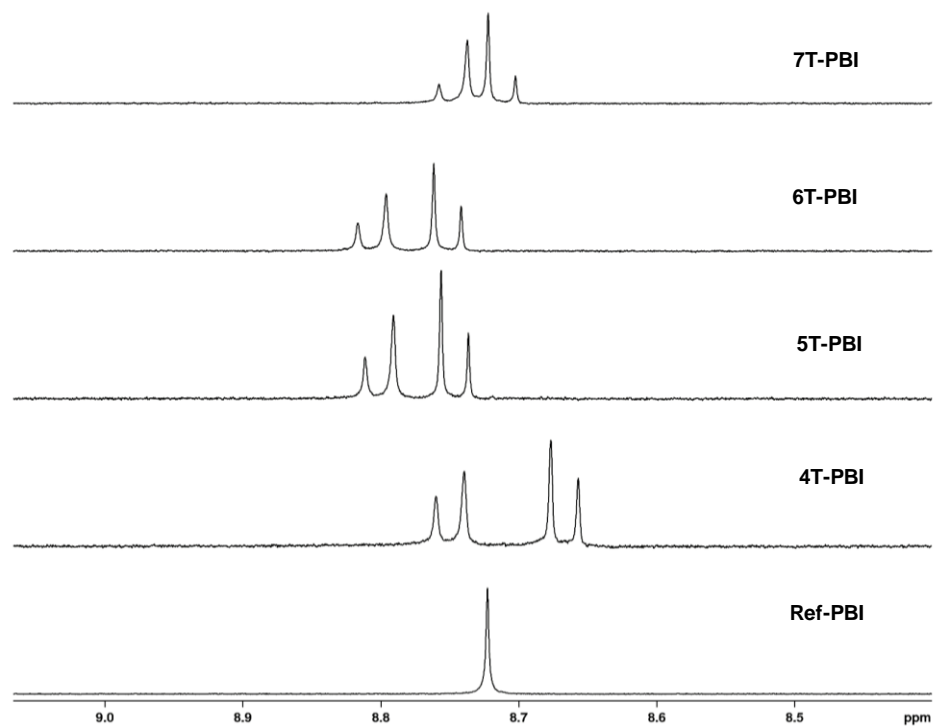

**Figure S9.** PBI proton signals of **Ref-PBI** in comparison to those of the macrocycles **4T-PBI**, **5T-PBI**<sup>[S4]</sup>, **6T-PBI** and **7T-PBI** (from bottom to top).  $^1\text{H}$  NMR spectra were recorded in  $\text{CD}_2\text{Cl}_2$  at room temperature at equal concentrations of  $c_0 = 10^{-4}$  M.

## Spectroelectrochemistry

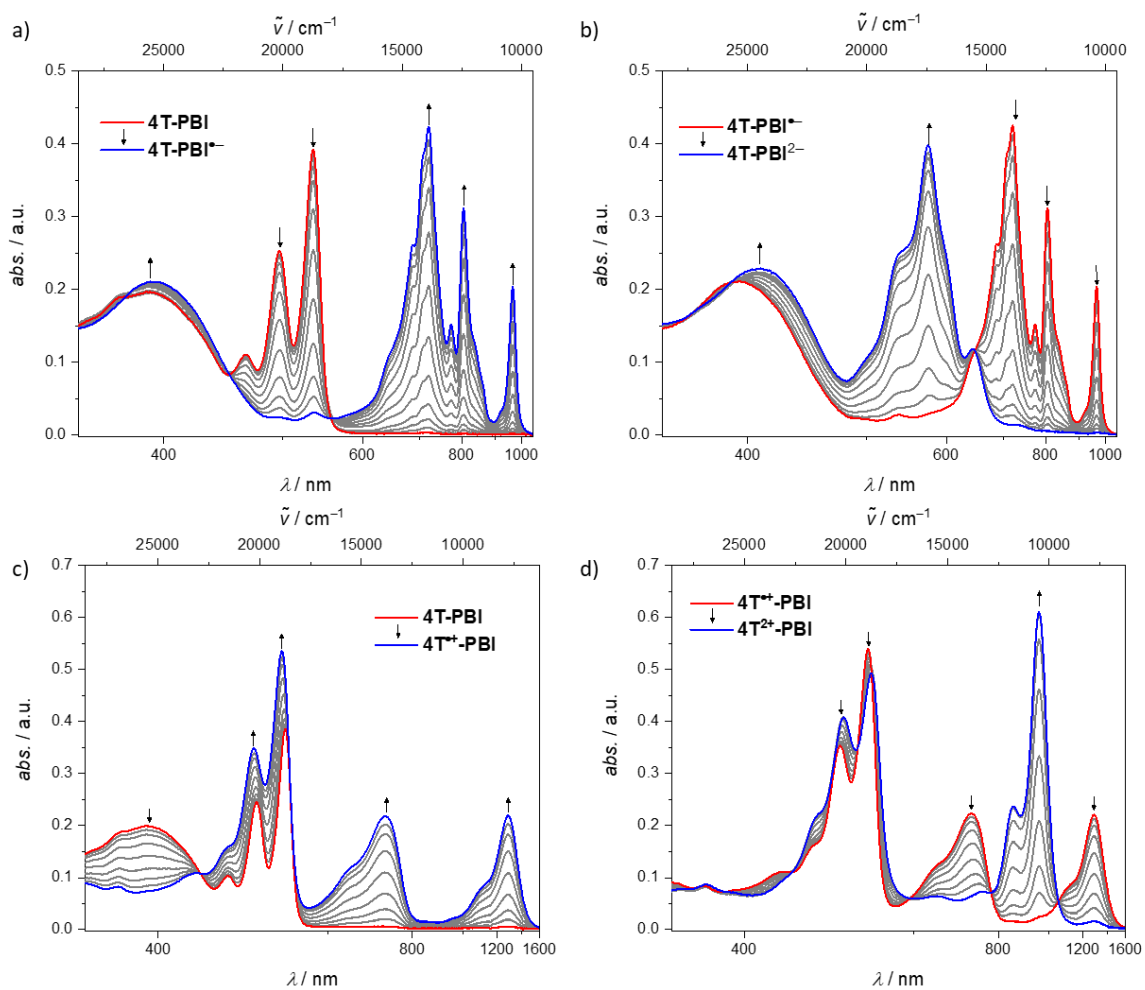

**Figure S10.** UV/Vis/NIR absorption changes of 4T-PBI upon electrochemical reduction to a) 4T-PBI<sup>-</sup> and b) 4T-PBI<sup>2-</sup> and electrochemical oxidation to c) 4T<sup>+</sup>-PBI and d) 4T<sup>2+</sup>-PBI in CH<sub>2</sub>Cl<sub>2</sub> solutions of Bu<sub>4</sub>NPF<sub>6</sub> at r.t. The arrows in the graphs indicate the spectral changes upon decreasing (a,b) and increasing (c,d) electric potential. Spectra at initial (red) and final (blue) potential are always highlighted in a)-d).

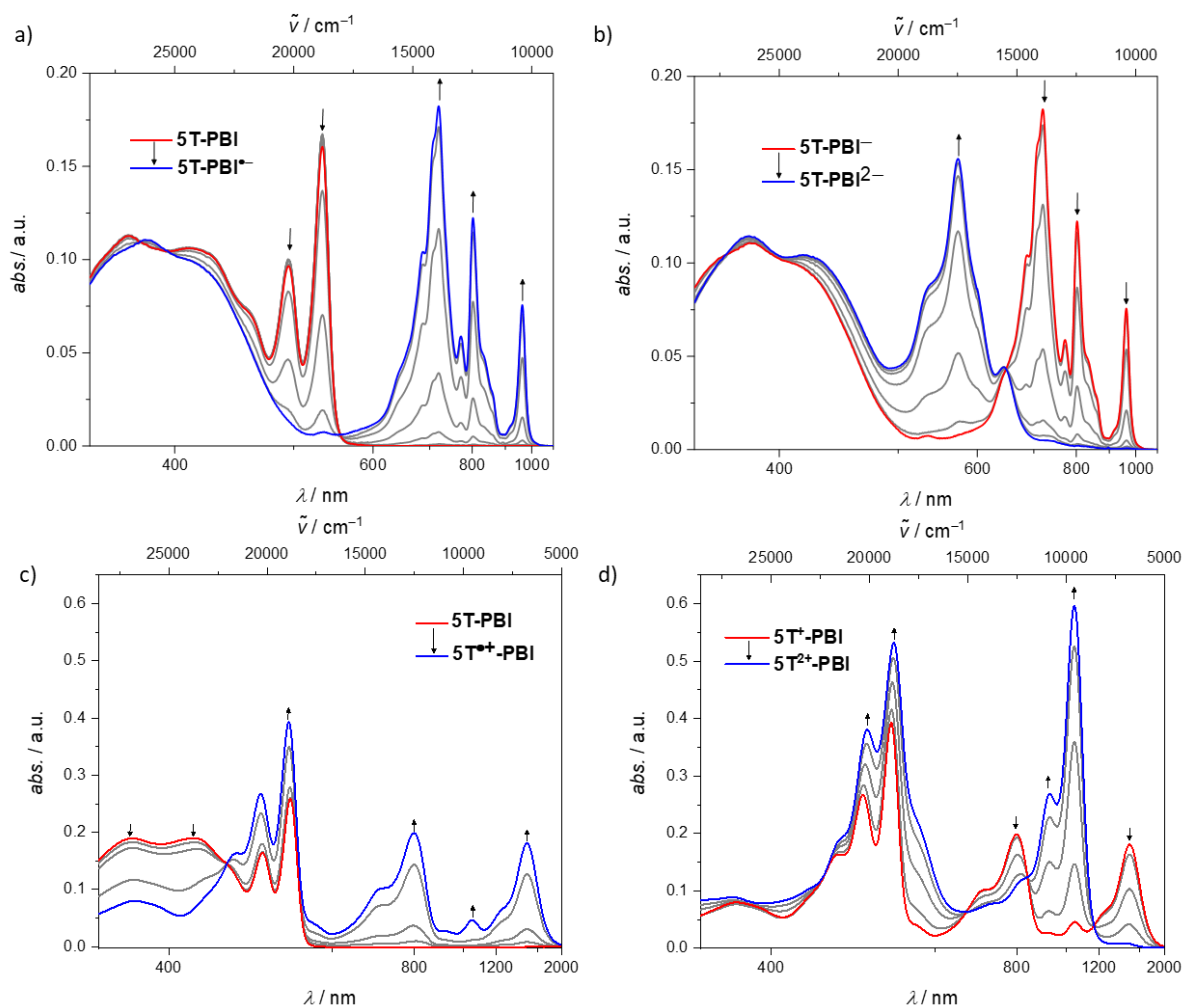

**Figure S11.** UV/Vis/NIR absorption changes of **5T-PBI**<sup>[S4]</sup> upon electrochemical reduction to a) **5T-PBI<sup>-</sup>** and b) **5T-PBI<sup>2-</sup>** and electrochemical oxidation to c) **5T<sup>+</sup>-PBI** and d) **5T<sup>2+</sup>-PBI** in CH<sub>2</sub>Cl<sub>2</sub> solutions of Bu<sub>4</sub>NPF<sub>6</sub> at r.t. The arrows in the graphs indicate the spectral changes upon decreasing (a,b) and increasing (c,d) electric potential. Spectra at initial (red) and final (blue) potential are always highlighted in a)-d).

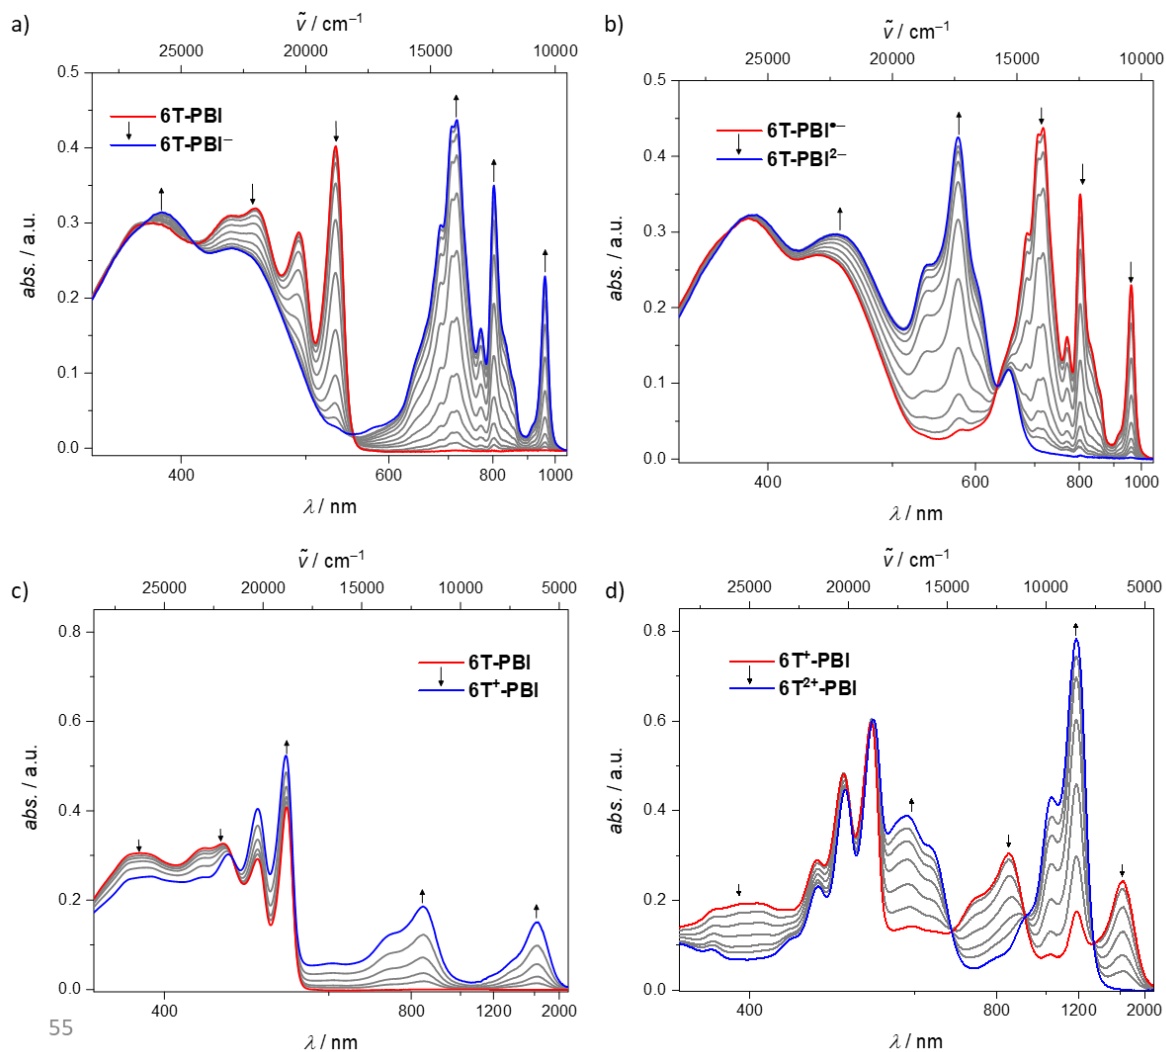

**Figure S12.** UV/Vis/NIR absorption changes of **6T-PBI** upon electrochemical reduction to a) **6T-PBI<sup>-</sup>** and b) **6T-PBI<sup>2-</sup>** and electrochemical oxidation to c) **6T<sup>+</sup>-PBI** and d) **6T<sup>2+</sup>-PBI** in CH<sub>2</sub>Cl<sub>2</sub> solutions of Bu<sub>4</sub>NPF<sub>6</sub> at r.t. The arrows in the graphs indicate the spectral changes upon decreasing (a,b) and increasing (c,d) electric potential. Spectra at initial (red) and final (blue) potential are always highlighted in a)-d).

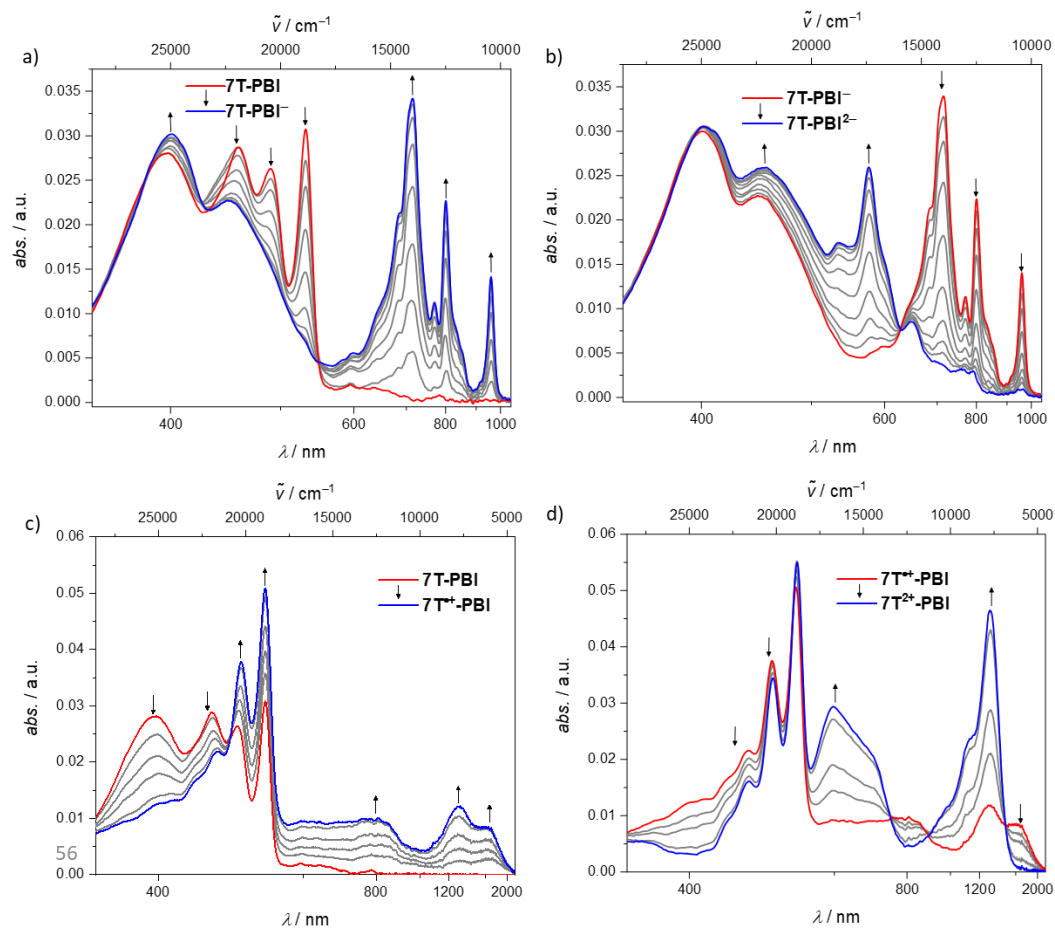

**Figure S13.** UV/Vis/NIR absorption changes of **7T-PBI** upon electrochemical reduction to a) **7T-PBI<sup>-</sup>** and b) **7T-PBI<sup>2-</sup>** and electrochemical oxidation to c) **7T<sup>+</sup>-PBI** and d) **7T<sup>2+</sup>-PBI** in  $\text{CH}_2\text{Cl}_2$  solutions of  $\text{Bu}_4\text{NPF}_6$  at r.t. The arrows in the graphs indicate the spectral changes upon decreasing (a,b) and increasing (c,d) electric potential. Spectra at initial (red) and final (blue) potential are always highlighted in a)-d).

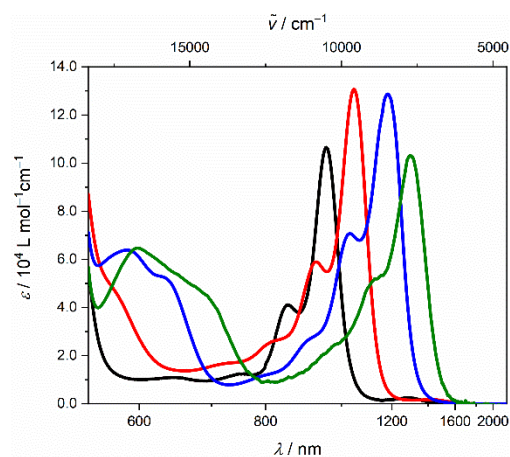

**Figure S14.** UV/Vis/NIR absorption spectra of the dications of **4T-PBI** (black), **5T-PBI<sup>[S4]</sup>** (red), **6T-PBI** (blue) and **7T-PBI** (green), respectively. All measurements were carried out in  $\text{CH}_2\text{Cl}_2$  solutions with  $\text{Bu}_4\text{NPF}_6$  at room temperature ( $c_0 = 10^{-4}$  M).

## Optical Properties in Cyclohexane

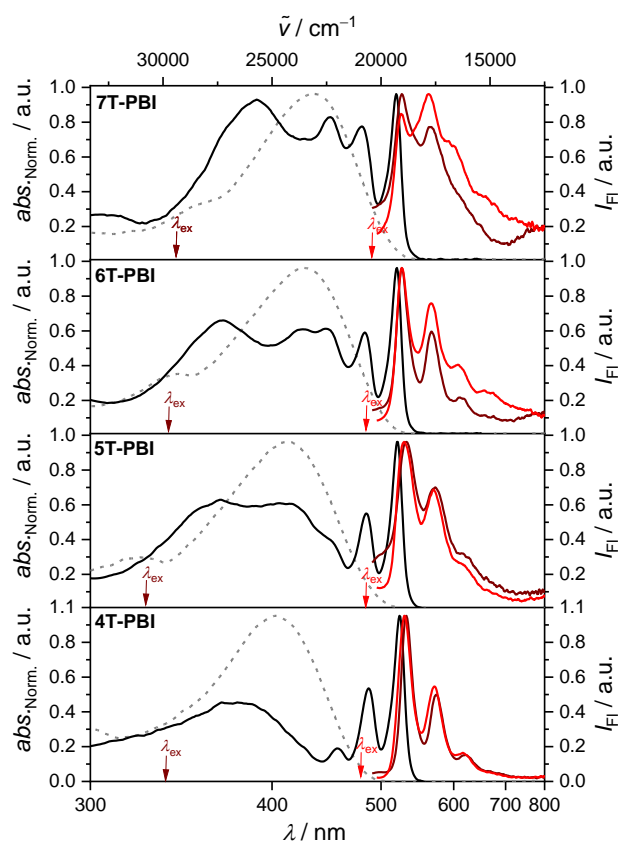

**Figure S15.** Normalized UV/vis absorption (black solid, grey dashed) and emission (red, maroon) spectra of **4T-PBI**, **5T-PBI**<sup>[S4]</sup>, **6T-PBI** and **7T-PBI** (black, red, maroon) as well as of the corresponding reference donor structures **4T-7T**<sup>[S5]</sup> (grey) in cyclohexane at room temperature ( $c_0 = 10^{-7}$  M). The wavelengths for excitation ( $\lambda_{\text{ex}}$ ) at 400 nm (maroon) and 480 nm (red) to obtain the fluorescence spectra are highlighted by arrows.

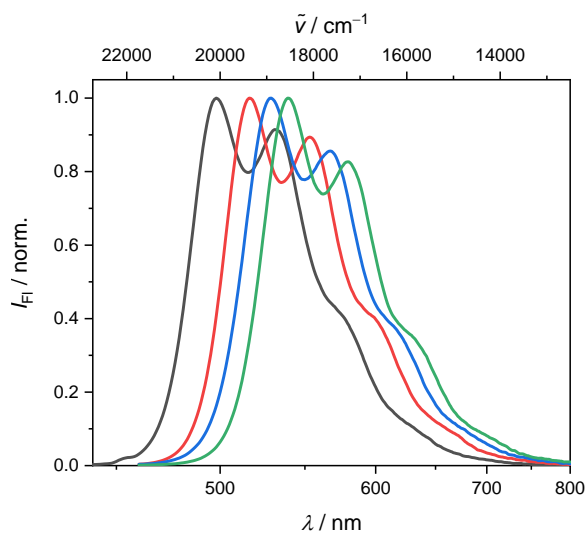

**Figure S16.** Normalized emission spectra of **4T** (black line), **5T** (red line), **6T** (blue line), and **7T** (green line) in cyclohexane ( $c_0=10^{-7}$  M) at room temperature.<sup>[S5]</sup>

## DFT and TDDFT calculations

The calculations of the macrocyclic strain energies ( $\Delta E_{\text{strain}}$ ) have been performed as described in ref. [S4].

**Table S3.** Macrocyclic strain energies of all macrocycles.

|                                                            | 4T-PBI | 5T-PBI | 6T-PBI | 7T-PBI | 7T-PBI-T |
|------------------------------------------------------------|--------|--------|--------|--------|----------|
| $\Delta E_{\text{strain}} / \text{kJ}\cdot\text{mol}^{-1}$ | 19.6   | 13.9   | 17.2   | 22.5   | 30.6     |

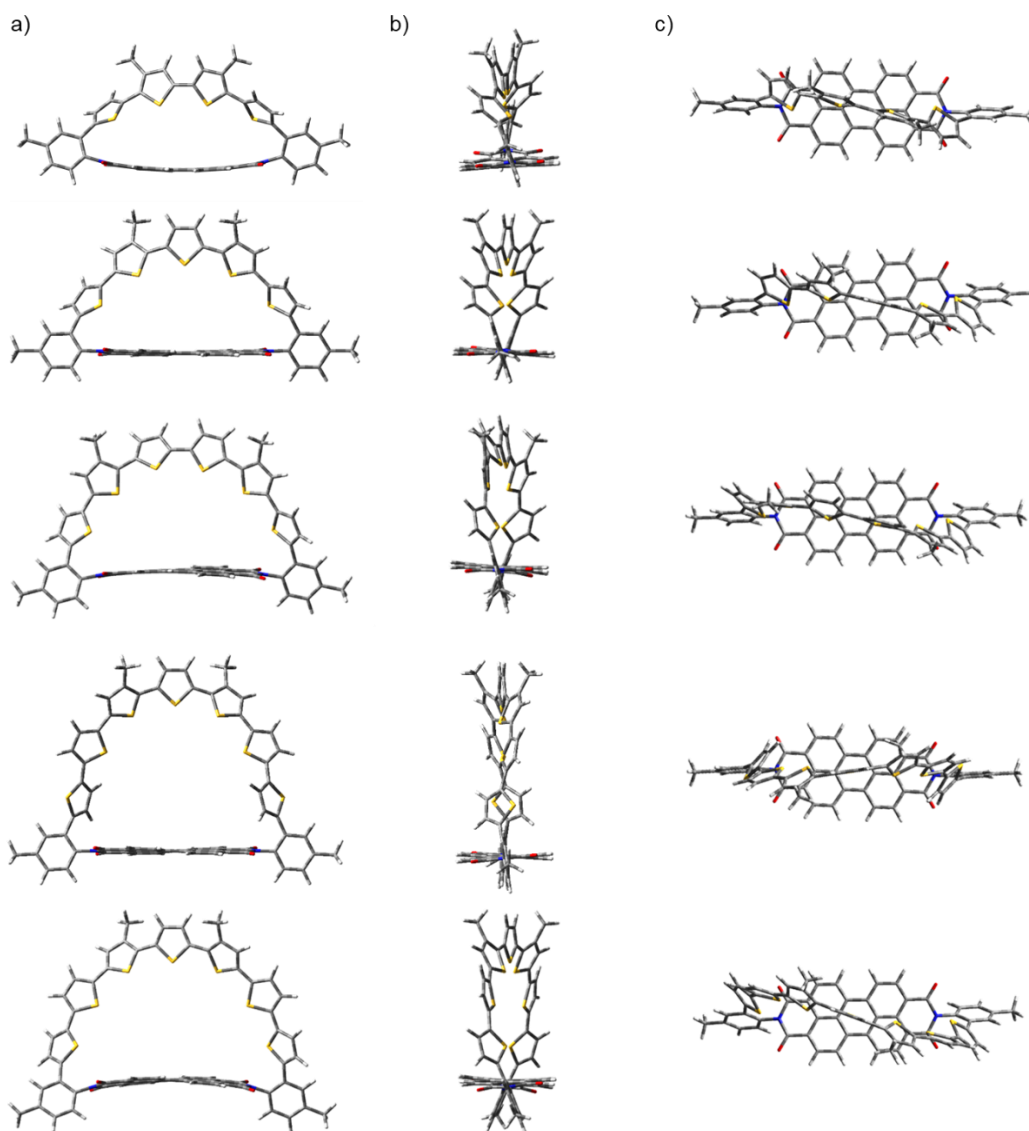

**Figure S17.** Side view (a), view along the  $N,N'$ -axis (b) and top (c) view onto the  $\pi$ -surface of **4T-PBI**, **5T-PBI**<sup>[S4]</sup>, **6T-PB**, **7T-PBI** and **7T-PBI-T** (from top to bottom). The quantum mechanics calculations were carried out on the level of B3LYP density functional with the 6-31G(d) basis set as implemented in with Gaussian 16. Aliphatic chains were replaced by methyl groups. Color code: carbon = light grey, hydrogen = white, nitrogen = blue, oxygen = red, sulfur = yellow.



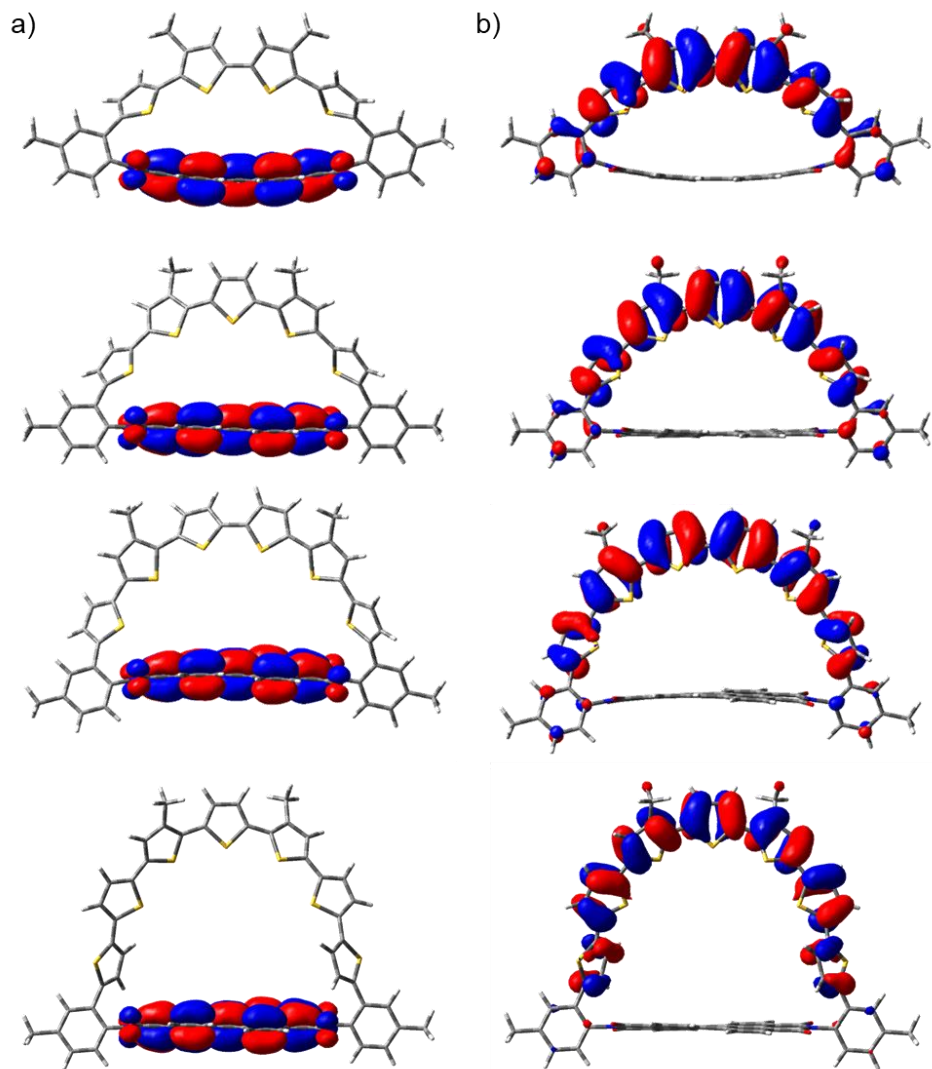

**Figure S18.** LUMOs (a) and HOMOs (b) of **4T-PBI**, **5T-PBI**<sup>[S4]</sup>, **6T-PB** and **7T-PBI** (from top to bottom) based on geometry optimized structures from DFT calculations. The quantum mechanics calculations were carried out on the level of B3LYP density functional with the 6-31G(d) basis set as implemented in with Gaussian 16. Aliphatic chains were replaced by methyl groups.

**Table S4.** First excited state ( $S_1$ ) energy predictions of **4T-PBI**, **5T-PBI**<sup>[S4]</sup>, **6T-PB** and **7T-PBI** with TDDFT at the B3LYP/6-31G(d) level of theory (H = HOMO, L = LUMO).

| Compound      | Excitation Energy / eV | Wavelength / nm | Osc. Strength | Contribution            |
|---------------|------------------------|-----------------|---------------|-------------------------|
| <b>4T-PBI</b> | 1.36                   | 911             | 0.0000        | H $\rightarrow$ L(100%) |
| <b>5T-PBI</b> | 1.18                   | 1051            | 0.0000        | H $\rightarrow$ L(100%) |
| <b>6T-PBI</b> | 1.17                   | 1064            | 0.0000        | H $\rightarrow$ L(100%) |
| <b>7T-PBI</b> | 1.14                   | 1090            | 0.0002        | H $\rightarrow$ L(100%) |

## Transient Absorption Spectra

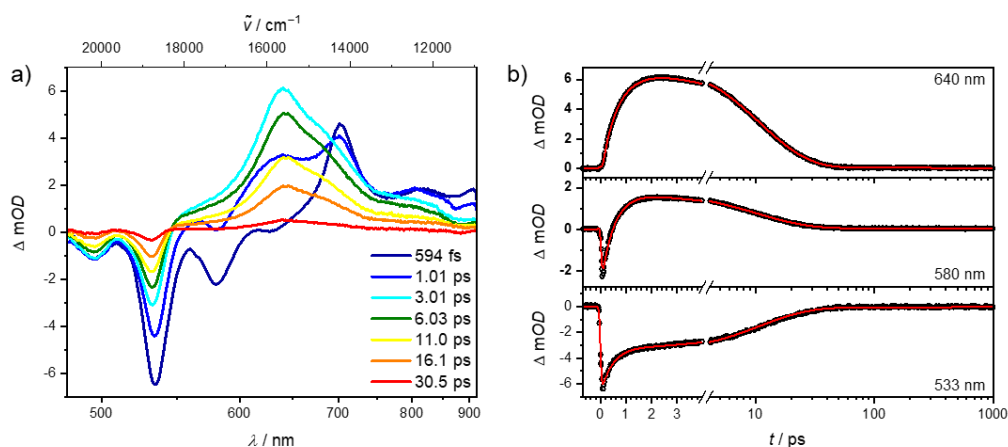

**Figure S19.** a) Transient absorption spectra of **4T-PBI** in CH<sub>2</sub>Cl<sub>2</sub> after excitation at 530 nm and b) time scans and fit (red line) at selected wavelengths.

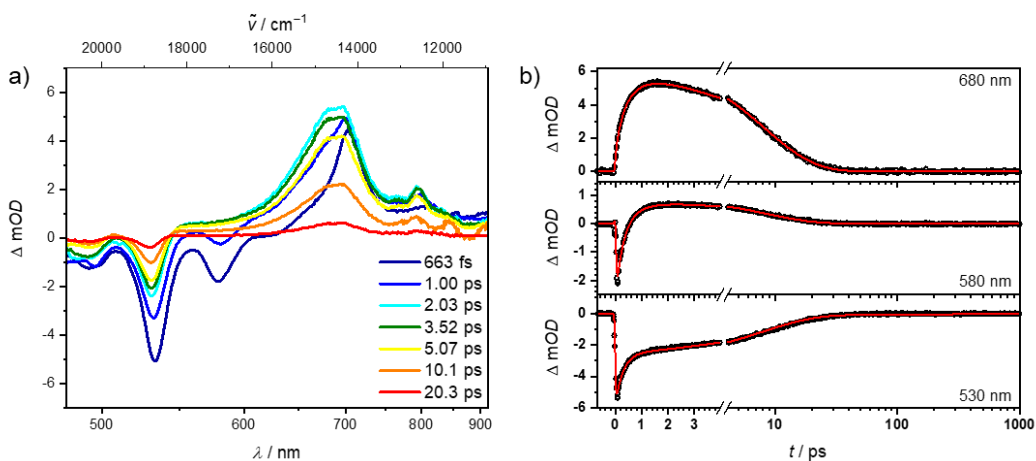

**Figure S20.** a) Transient absorption spectra of **6T-PBI** in CH<sub>2</sub>Cl<sub>2</sub> after excitation at 530 nm and b) time scans and fit (red line) at selected wavelengths.

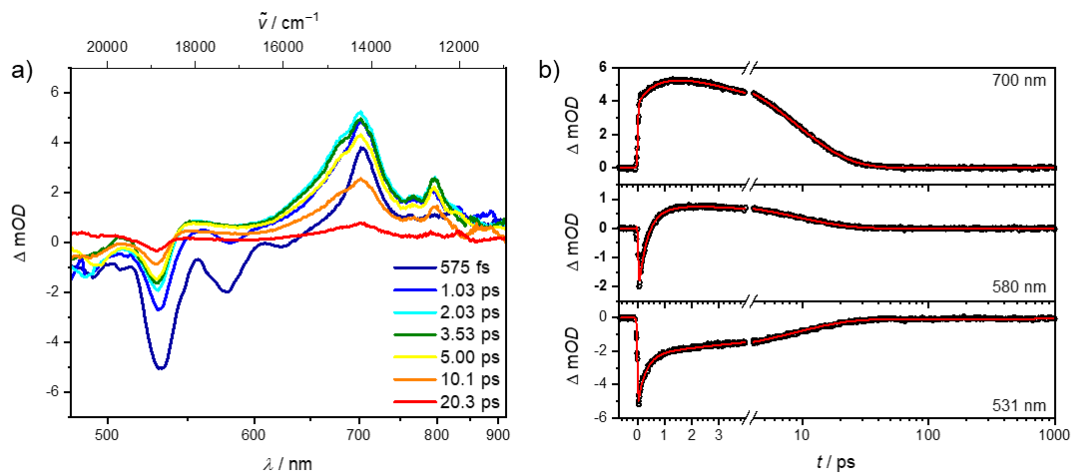

**Figure S21.** a) Transient absorption spectra of **7T-PBI** in  $\text{CH}_2\text{Cl}_2$  after excitation at 530 nm and b) time scans and fit (red line) at selected wavelengths.

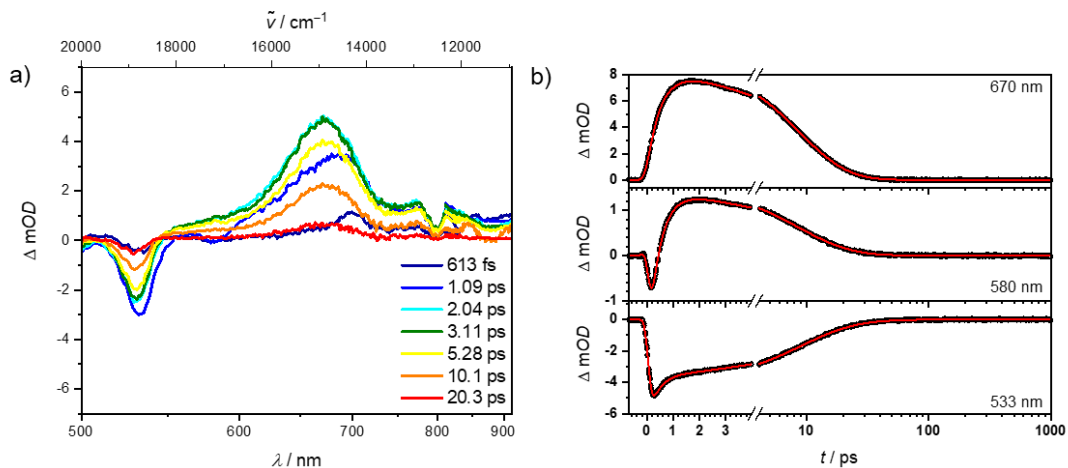

**Figure S22.** a) UV/Vis region of the transient absorption spectra of **5T-PBI** in  $\text{CH}_2\text{Cl}_2$  after excitation at 400 nm and b) time scans and fit (red line) at selected wavelengths.

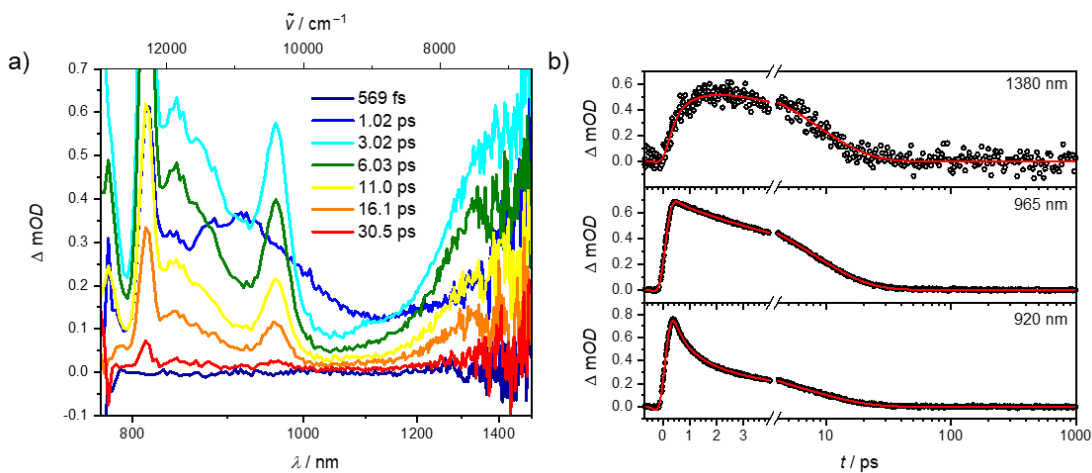

**Figure S23.** a) NIR region of the transient absorption spectra of **5T-PBI** in  $\text{CH}_2\text{Cl}_2$  after excitation at 400 nm and b) time scans and fit (red line) at selected wavelengths.

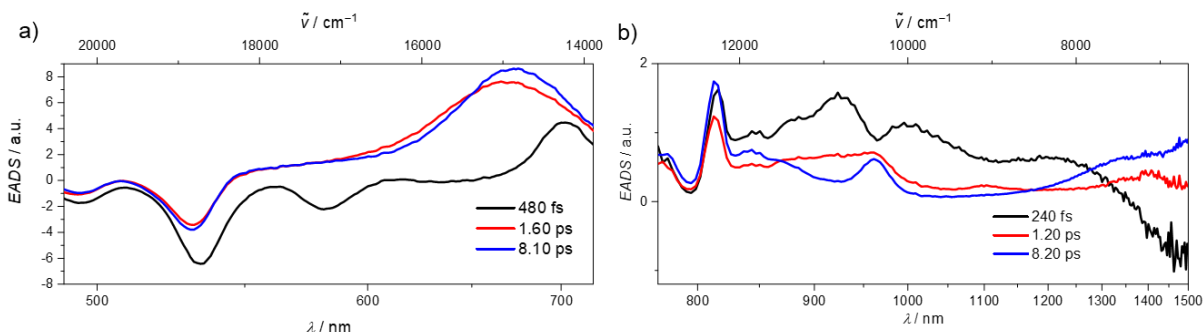

**Figure S24.** Evolution associated difference spectra (EADS) and lifetimes in the a) UV/Vis and b) NIR region from a global fit analysis of the transient spectra of **5T-PBI** obtained by excitation at 400 nm in  $\text{CH}_2\text{Cl}_2$  ( $c_0 = 10^{-4}$  M) at room temperature.

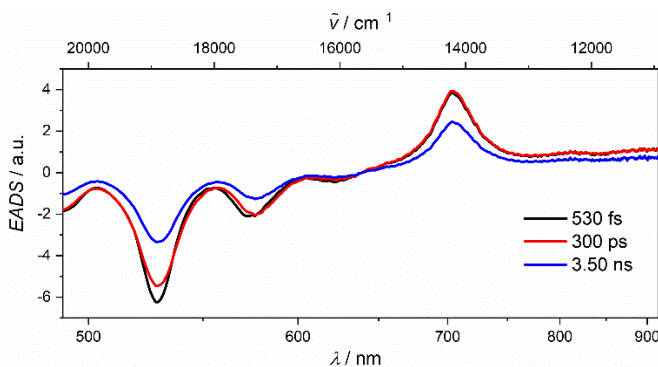

**Figure S25.** Evolution associated difference spectra (EADS) and lifetimes from a global fit analysis of the transient spectra of a 1:1 mixture comprising **4T** and **Ref-PBI** obtained by excitation at 530 nm in  $\text{CH}_2\text{Cl}_2$  ( $c_0 = 10^{-4}$  M) at room temperature.

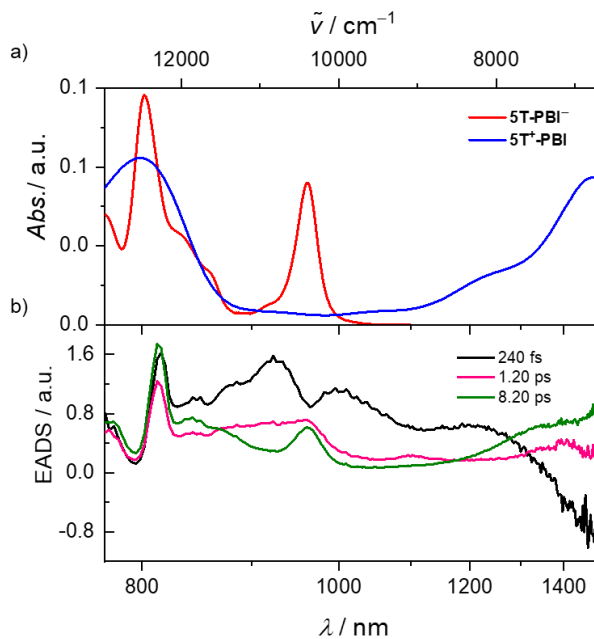

**Figure S26.** a) Normalized NIR absorption spectra of **5T-PBI** upon electrochemical reduction to **5T-PBI<sup>-</sup>** (red line) and electrochemical oxidation to **5T<sup>+</sup>-PBI** (blue line) in  $\text{CH}_2\text{Cl}_2$  solutions with  $\text{Bu}_4\text{NPF}_6$  at room temperature ( $c_0 = 10^{-4}$  M).<sup>[S4]</sup> b) Evolution associated difference spectra (EADS) and lifetimes from a global fit analysis of the transient spectra of **5T-PBI** obtained by excitation at 400 nm in  $\text{CH}_2\text{Cl}_2$  ( $c_0 = 10^{-4}$  M) at room temperature.

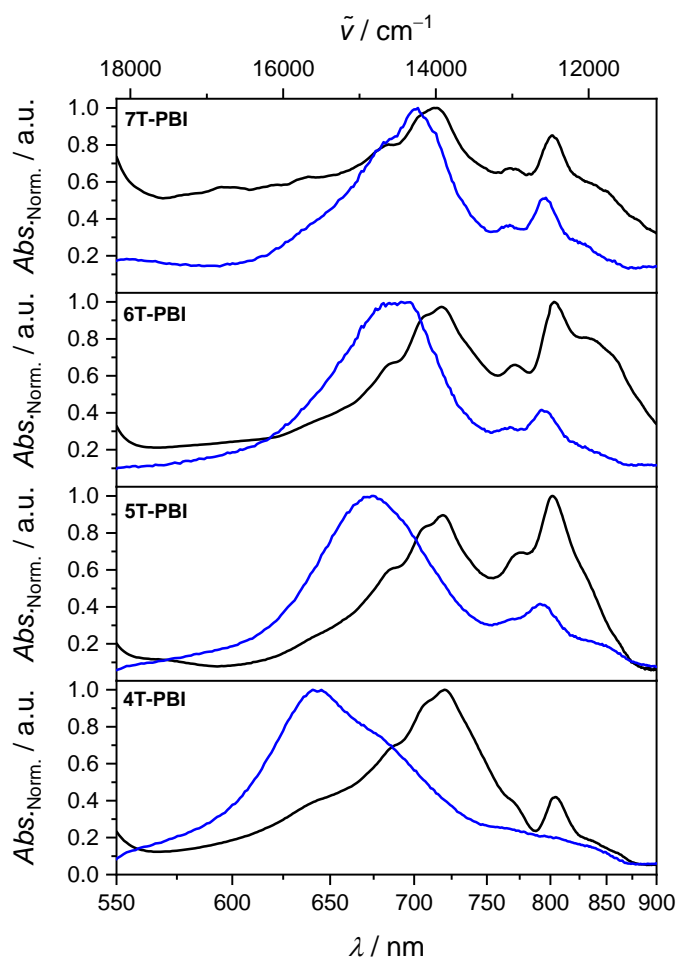

**Figure S27.** Sum of the normalized anion and cation spectra (black lines) obtained from SEC and the EADS of the normalized “cold” CT/CS state (blue lines) of **4T-PBI**, **5T-PBI**<sup>[S4]</sup>, **6T-PB** and **7T-PBI** in CH<sub>2</sub>Cl<sub>2</sub> at room temperature.

# NMR Spectra

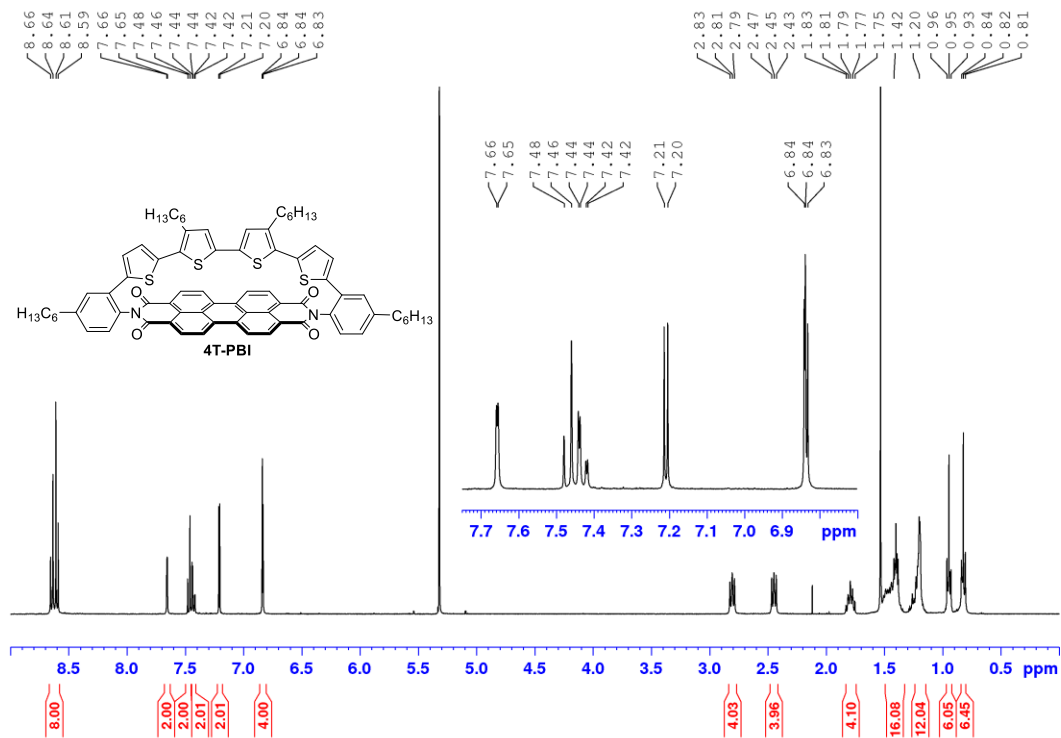

Figure S28.  $^1H$  NMR spectrum (400 MHz) of 4T-PBI in  $CD_2Cl_2$  at 298 K.

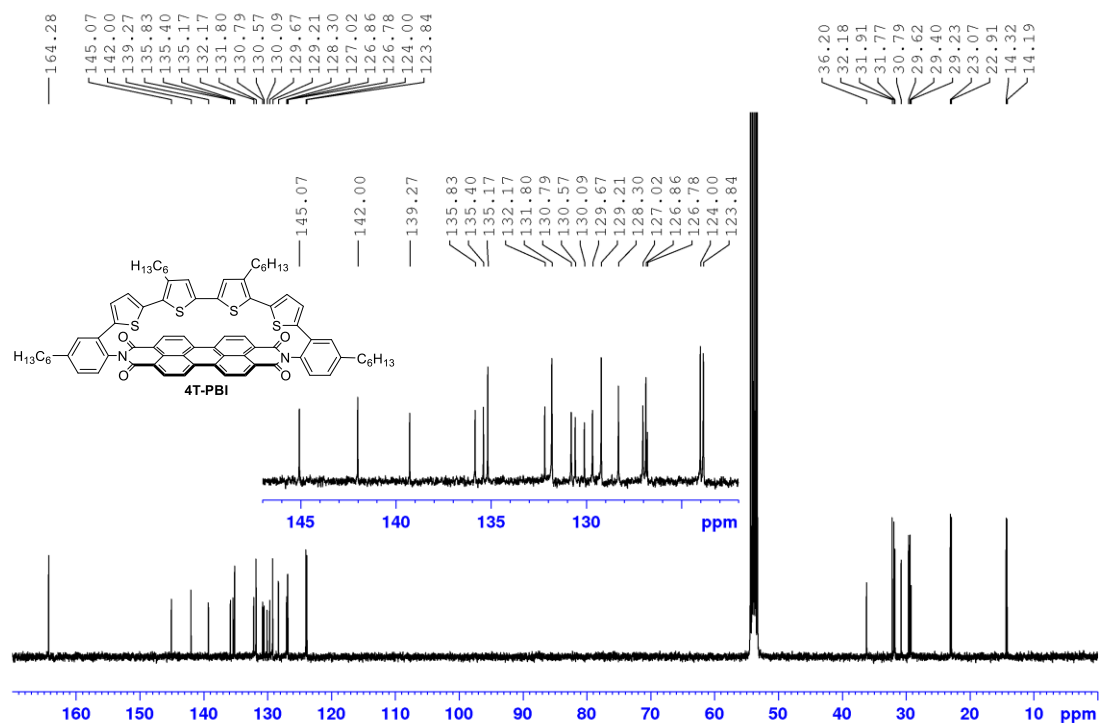

Figure S29.  $^{13}C$  NMR spectrum (101 MHz) of 4T-PBI in  $CD_2Cl_2$  at 298 K.

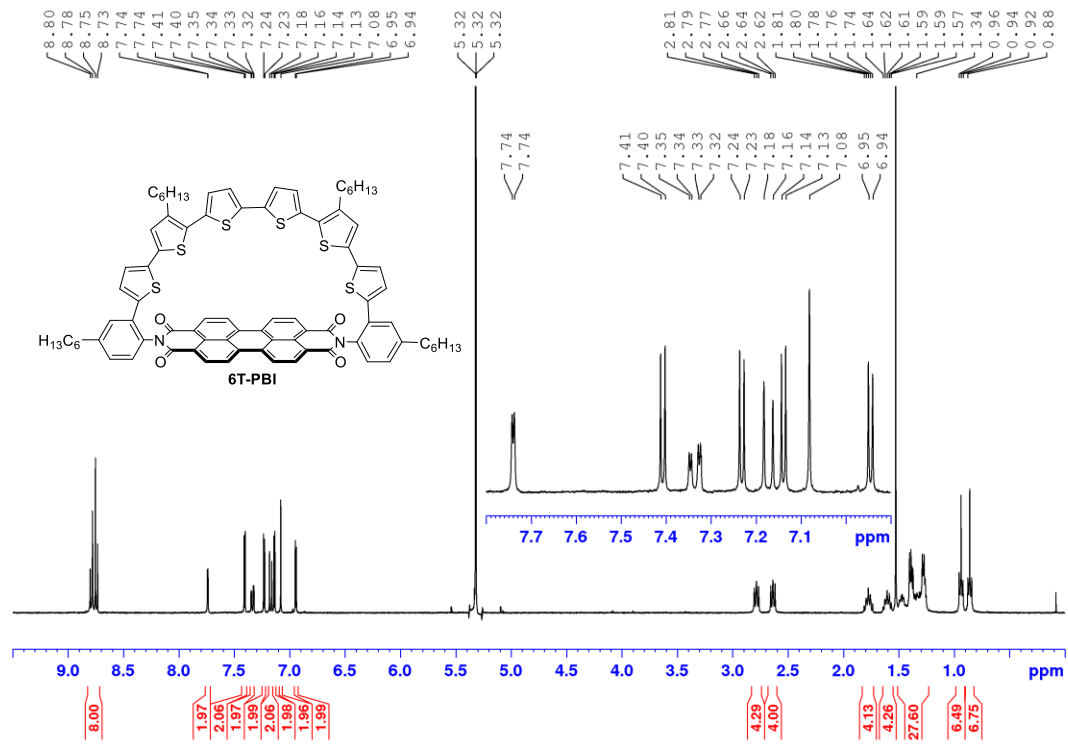

Figure S30. <sup>1</sup>H NMR spectrum (400 MHz) of 6T-PBI in CD<sub>2</sub>Cl<sub>2</sub> at 298 K.

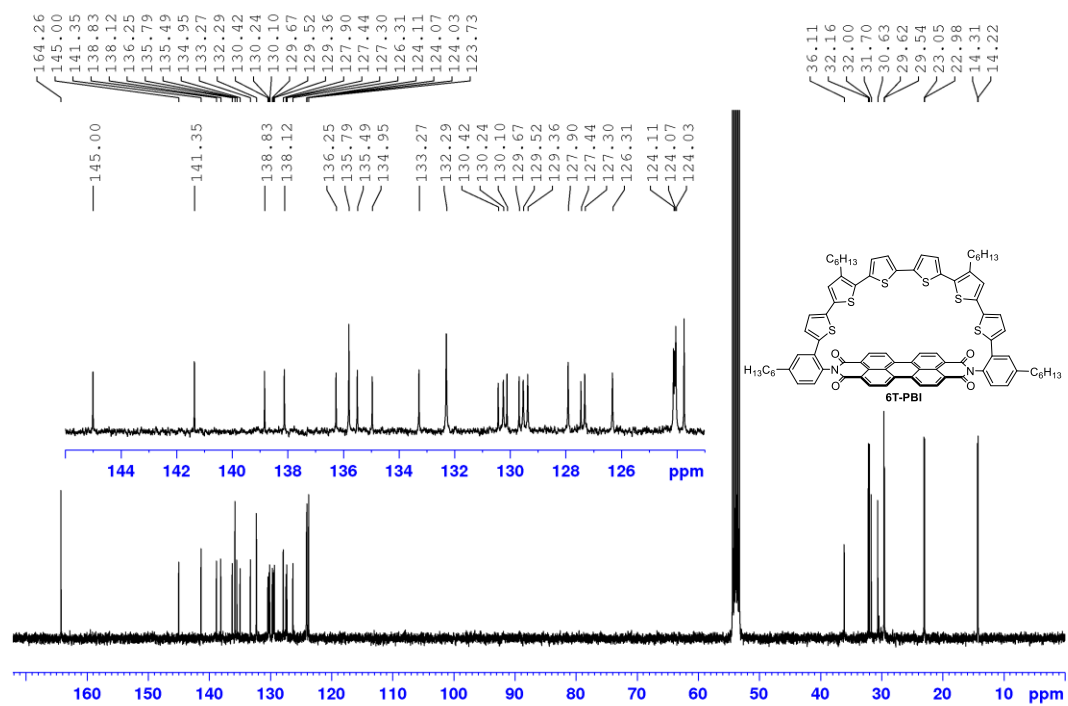

Figure S31. <sup>13</sup>C NMR spectrum (101 MHz) of 6T-PBI in CD<sub>2</sub>Cl<sub>2</sub> at 298 K.

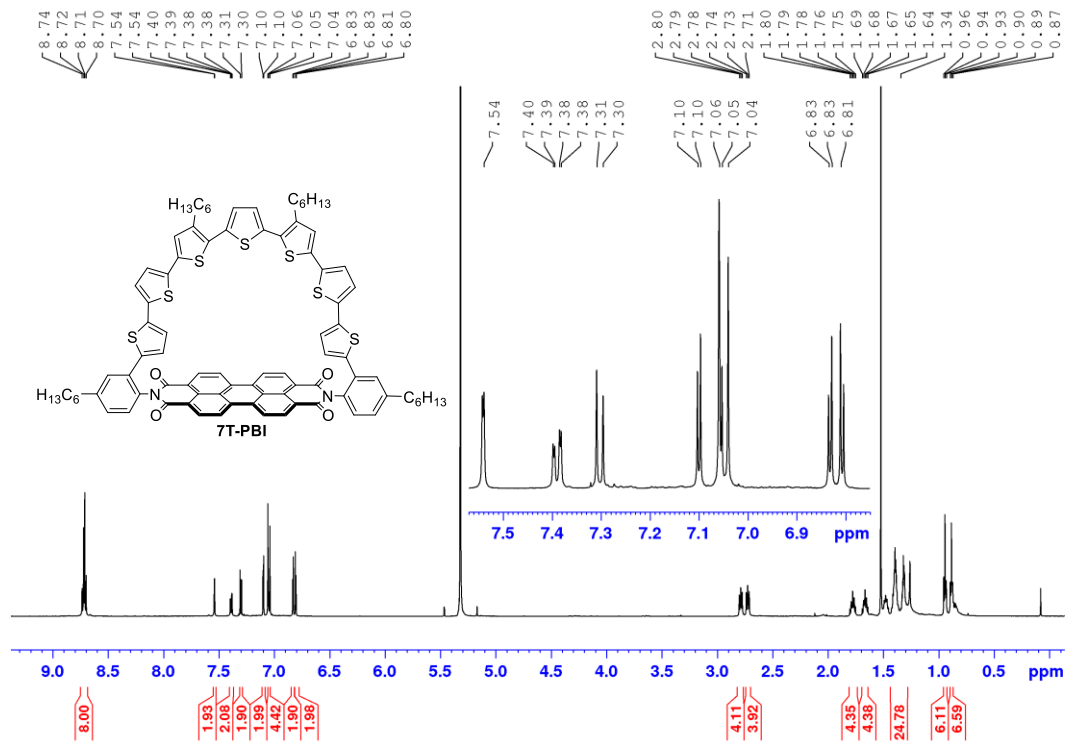

Figure S32.  $^1H$  NMR spectrum (600 MHz) of 7T-PBI in  $CD_2Cl_2$  at 298 K.

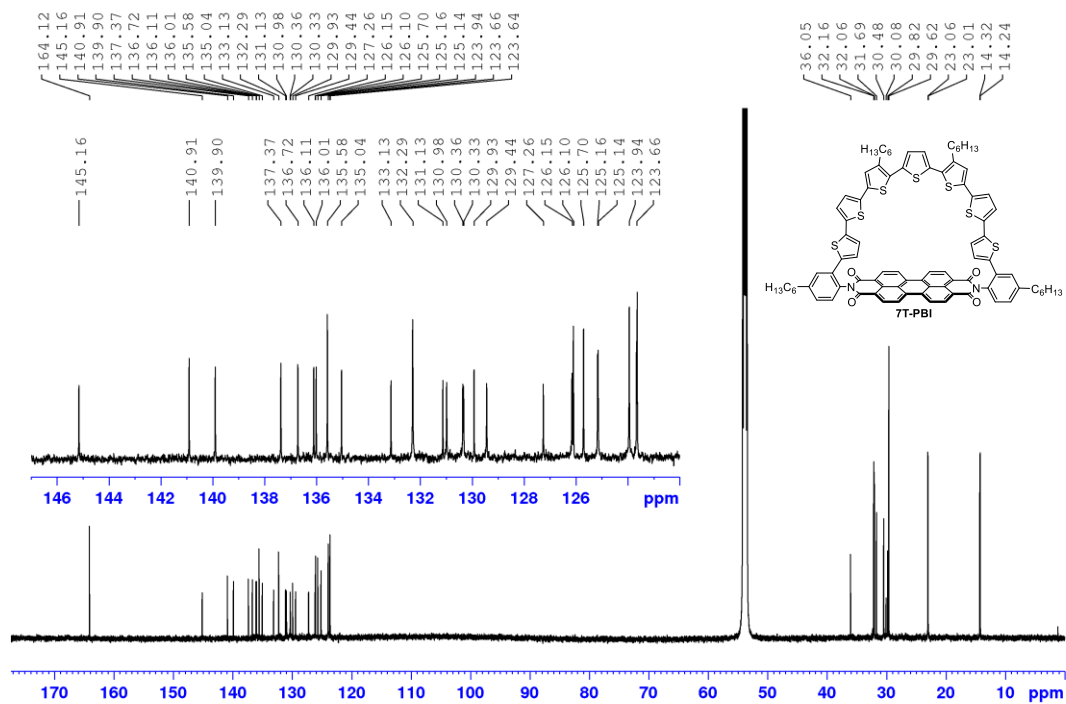

Figure S33.  $^{13}C$  NMR spectrum (150 MHz) of 7T-PBI in  $CD_2Cl_2$  at 298 K.



## Mass Spectra

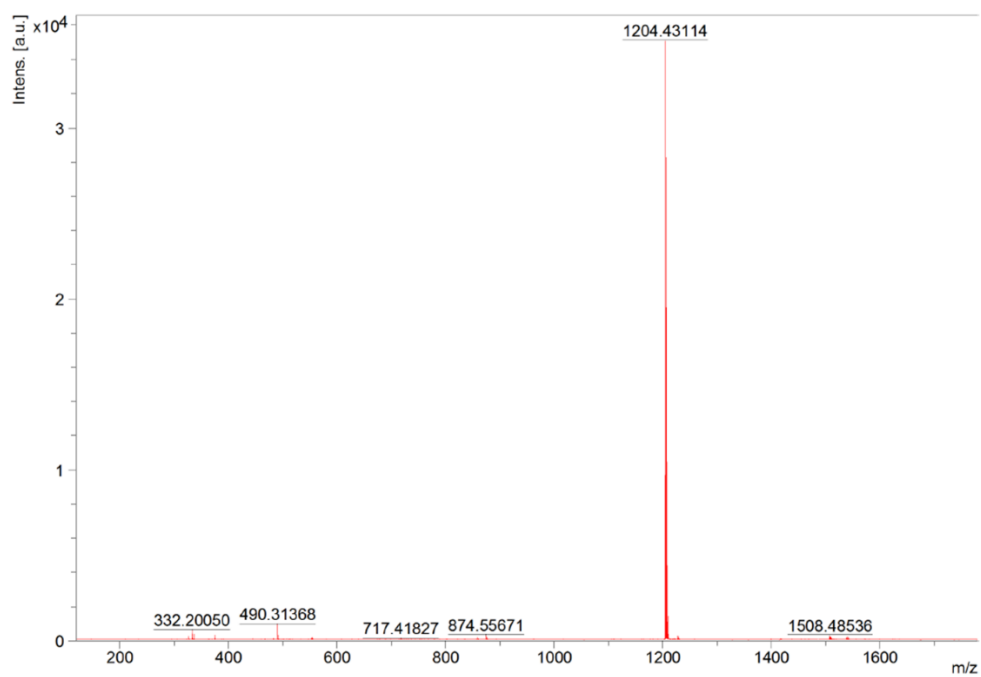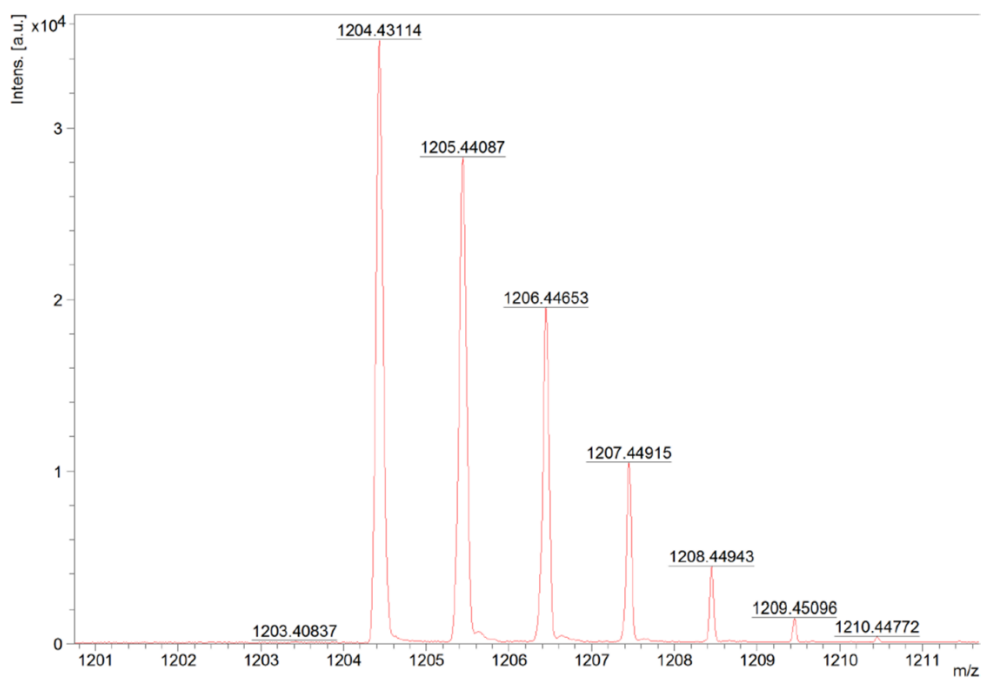

| Formula                                                                 | Mass       | Error  | mSigma  | DbIEq | N rule | Electron Configuration |
|-------------------------------------------------------------------------|------------|--------|---------|-------|--------|------------------------|
| C <sub>76</sub> H <sub>72</sub><br>N <sub>2</sub> O <sub>4</sub> S<br>4 | 1,204.4369 | 4.8169 | 28.4696 | 42.00 | ok     | odd                    |

Figure S34. HRMS (MALDI-TOF, pos. mode, DCTB in CHCl<sub>3</sub>) spectra of 4T-PBI.

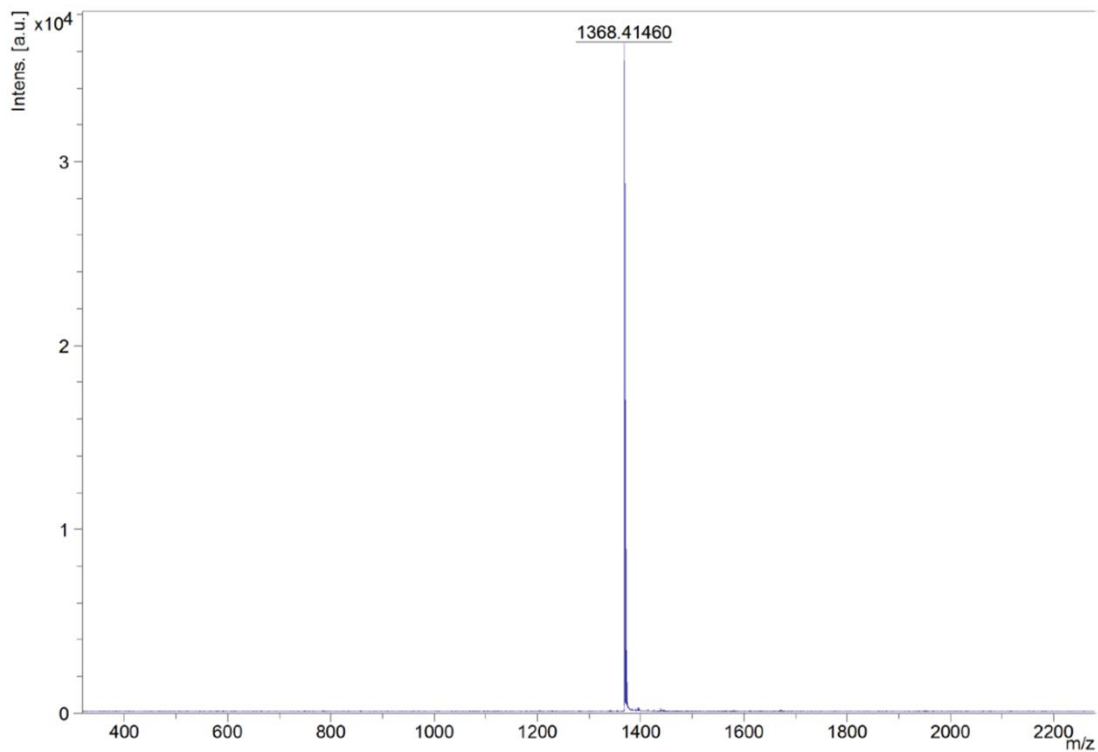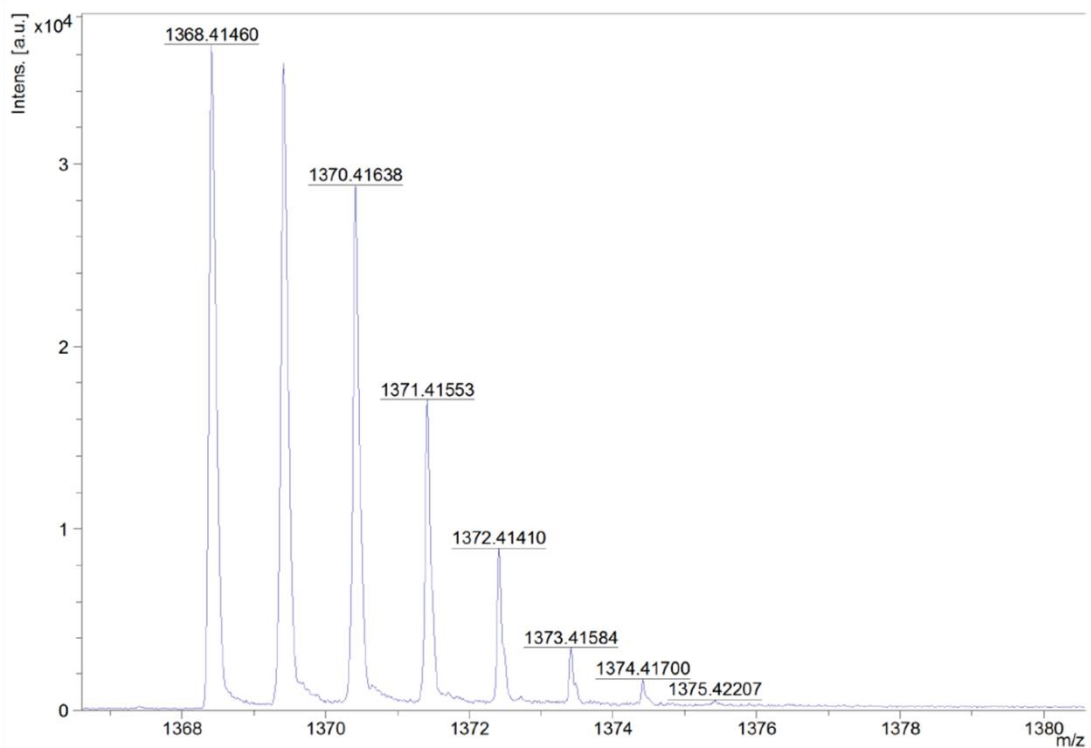

| Formula                                                                      | Mass       | Error  | mSigma  | DbIEq | N rule | Electron Configuration |
|------------------------------------------------------------------------------|------------|--------|---------|-------|--------|------------------------|
| C <sub>84</sub> H <sub>76</sub> N <sub>2</sub> O <sub>4</sub> S <sub>6</sub> | 1,368.4124 | 1.6181 | 30.5827 | 48.00 | ok     | odd                    |

**Figure S35.** HRMS (MALDI-TOF, pos. mode, DCTB in CHCl<sub>3</sub>) spectra of **6T-PBI**.

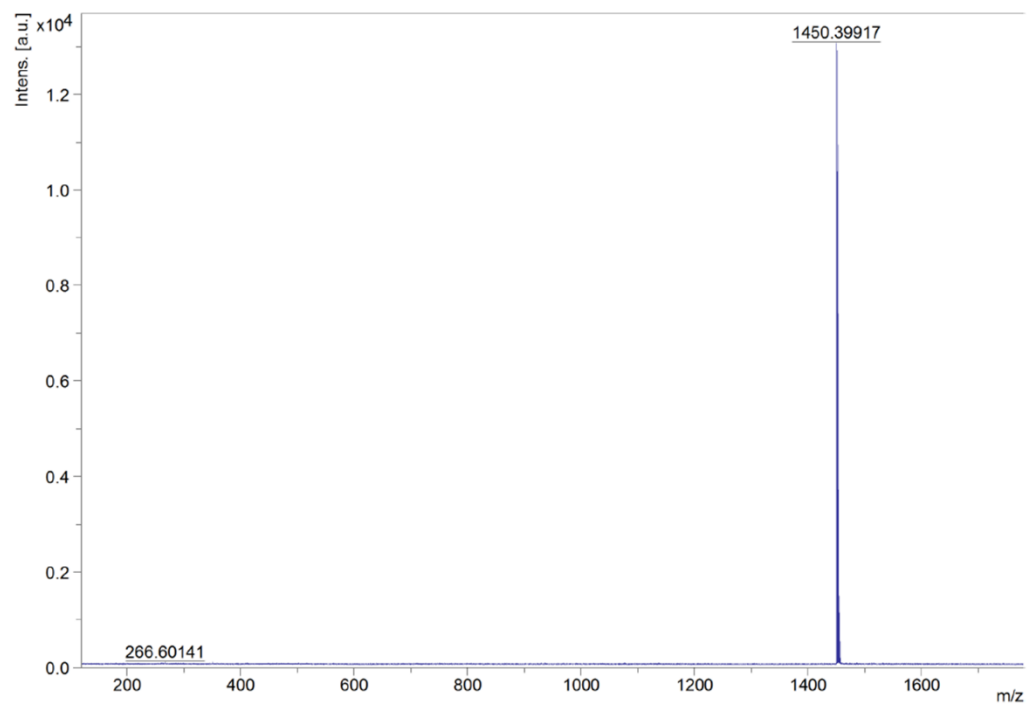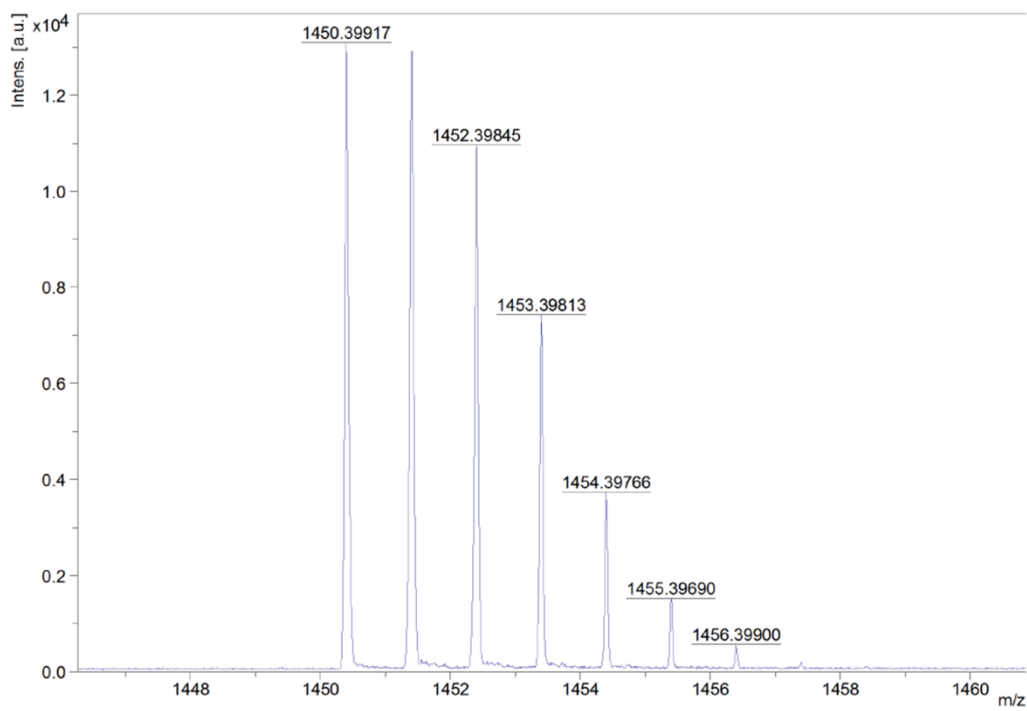

| Formula                                                                 | Mass       | Error  | mSigma  | DbIEq | N rule | Electron Configuration |
|-------------------------------------------------------------------------|------------|--------|---------|-------|--------|------------------------|
| C <sub>88</sub> H <sub>78</sub><br>N <sub>2</sub> O <sub>4</sub> S<br>7 | 1,450.4001 | 0.6455 | 30.9377 | 51.00 | ok     | odd                    |

**Figure S36.** HRMS (MALDI-TOF, pos. mode, DCTB in CHCl<sub>3</sub>) spectra of **7T-PBI**.

# Cartesian Coordinates Received from DFT Calculations

## Final Geometry:

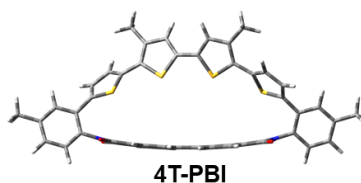

Total energy: -4156.52965648 Hartrees

|     |          |          |          |     |           |          |          |     |           |          |          |
|-----|----------|----------|----------|-----|-----------|----------|----------|-----|-----------|----------|----------|
| C1  | -1.38008 | -2.4548  | 2.49154  | O25 | 5.55296   | -1.93331 | -2.52719 | H49 | 3.57179   | -2.353   | 3.19976  |
| C2  | -2.77272 | -2.33778 | 2.54206  | C26 | -4.9705   | -2.00822 | 1.46299  | H50 | 1.12188   | -2.53802 | 3.34617  |
| C3  | -3.51181 | -2.25279 | 1.37498  | C27 | -5.08095  | -2.04637 | -1.03646 | H51 | 0.83116   | -2.49697 | -3.43061 |
| C4  | -2.85715 | -2.32836 | 0.12148  | O28 | -5.56092  | -1.91046 | 2.52724  | H52 | 3.28285   | -2.29576 | -3.49258 |
| C5  | -1.43412 | -2.44224 | 0.06109  | N29 | -5.65038  | -1.83875 | 0.2388   | H53 | -8.99081  | 1.31137  | -0.19926 |
| C6  | -0.68586 | -2.48016 | 1.2804   | O30 | -5.76797  | -1.99949 | -2.04348 | H54 | -10.11352 | -2.67671 | 0.91918  |
| C7  | -3.61717 | -2.2719  | -1.07194 | C31 | -7.02679  | -1.40547 | 0.28671  | H55 | -7.72708  | -3.34485 | 0.85597  |
| C8  | -2.98112 | -2.37415 | -2.29686 | C32 | 7.02092   | -1.43428 | -0.28672 | H56 | 7.71317   | -3.37657 | -0.85592 |
| C9  | -1.58853 | -2.48259 | -2.36472 | C33 | -7.36183  | -0.07259 | -0.02105 | H57 | 10.10235  | -2.71832 | -0.91918 |
| C10 | -0.79281 | -2.48742 | -1.21744 | C34 | -8.72323  | 0.28037  | 0.0146   | H58 | 8.99619   | 1.27442  | 0.19914  |
| C11 | 0.78255  | -2.4905  | 1.21756  | C35 | -9.7282   | -0.63263 | 0.3384   | H59 | -11.2878  | 0.86963  | 0.28823  |
| C12 | 0.67563  | -2.48305 | -1.28028 | C36 | -9.35428  | -1.94651 | 0.65018  | H60 | -11.68304 | -0.5525  | 1.26766  |
| C13 | 1.42404  | -2.44807 | -0.06098 | C37 | -8.01666  | -2.32577 | 0.62098  | H61 | -11.72627 | -0.65524 | -0.49339 |
| C14 | 2.84752  | -2.34    | -0.12138 | C38 | 8.00697   | -2.35869 | -0.62097 | H62 | 11.29133  | 0.82316  | -0.28883 |
| C15 | 3.60777  | -2.28652 | 1.07203  | C39 | 9.34616   | -1.98497 | -0.6502  | H63 | 11.72333  | -0.70309 | 0.49369  |
| C16 | 2.9713   | -2.38604 | 2.29696  | C40 | 9.72552   | -0.67264 | -0.33846 | H64 | 11.68084  | -0.60113 | -1.26743 |
| C17 | 1.57828  | -2.48878 | 2.36483  | C41 | 8.72435   | 0.24453  | -0.01469 | C65 | 6.38627   | 0.92981  | 0.41481  |
| C18 | 1.36994  | -2.46061 | -2.49142 | C42 | 7.36149   | -0.10279 | 0.02098  | C66 | 6.52603   | 1.83978  | 1.43897  |
| C19 | 2.76304  | -2.34927 | -2.54196 | C43 | -11.18084 | -0.21759 | 0.35272  | S67 | 4.87301   | 1.20986  | -0.42572 |
| C20 | 3.50248  | -2.2672  | -1.37489 | C44 | 11.17987  | -0.26363 | -0.35276 | C68 | 5.4269    | 2.72593  | 1.58158  |
| C21 | 5.07246  | -2.06701 | 1.03653  | H45 | -0.84145  | -2.49328 | 3.43073  | C69 | 7.38044   | 1.83372  | 2.10705  |
| C22 | 4.96216  | -2.02862 | -1.46293 | H46 | -3.2923   | -2.28207 | 3.49268  | C70 | 4.42397   | 2.51903  | 0.65607  |
| N23 | 5.64274  | -1.86188 | -0.23876 | H47 | -3.58146  | -2.33876 | -3.19967 | H71 | 5.34936   | 3.45746  | 2.37726  |
| O24 | 5.75967  | -2.02287 | 2.04354  | H48 | -1.13233  | -2.53379 | -3.34605 | C72 | -6.38235  | 0.95595  | -0.41491 |

|     |          |         |          |     |          |         |          |     |          |         |          |
|-----|----------|---------|----------|-----|----------|---------|----------|-----|----------|---------|----------|
| H73 | -6.51845 | 1.86663 | -1.43894 | C82 | 1.49208  | 4.84779 | 0.53316  | C91 | -3.85198 | 5.61612 | -1.1299  |
| S74 | -4.8678  | 1.22957 | 0.42543  | C83 | 0.71616  | 3.77324 | 0.15343  | H92 | -3.91439 | 5.73209 | -2.22031 |
| C75 | -5.41569 | 2.74825 | -1.58155 | H84 | 1.07982  | 5.84132 | 0.67746  | H93 | -4.85476 | 5.36876 | -0.76907 |
| H76 | -7.37296 | 1.86421 | -2.10691 | C85 | -0.70062 | 3.77614 | -0.1535  | H94 | -3.56926 | 6.59077 | -0.71783 |
| C77 | -4.41352 | 2.5371  | -0.65618 | C86 | -1.47216 | 4.85388 | -0.5331  | C95 | 3.87498  | 5.60026 | 1.13008  |
| H78 | -5.33524 | 3.47958 | -2.37712 | S87 | -1.69569 | 2.33839 | -0.04978 | H96 | 3.9378   | 5.71589 | 2.2205   |
| C79 | 3.15484  | 3.21169 | 0.52027  | C88 | -2.84994 | 4.56298 | -0.73646 | H97 | 4.87675  | 5.34883 | 0.76928  |
| C80 | 2.86866  | 4.55126 | 0.73651  | H89 | -1.05587 | 5.84574 | -0.6773  | H98 | 3.59627  | 6.57609 | 0.71807  |
| S81 | 1.70537  | 2.33146 | 0.04957  | C90 | -3.14157 | 3.22456 | -0.52036 |     |          |         |          |

### Final Geometry:

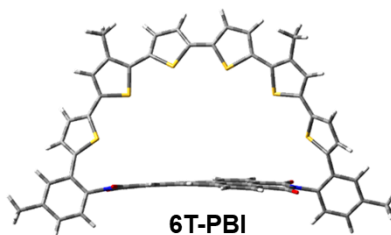

Total energy: -5260.15960267 Hartrees

|     |          |          |          |     |          |          |          |     |           |          |          |
|-----|----------|----------|----------|-----|----------|----------|----------|-----|-----------|----------|----------|
| C1  | -1.24767 | -2.70419 | 2.49259  | C18 | 1.33911  | -2.47185 | -2.56621 | C35 | -9.7628   | -3.94661 | 0.78795  |
| C2  | -2.64295 | -2.72593 | 2.58879  | C19 | 2.73492  | -2.48189 | -2.66266 | C36 | -8.75109  | -4.88993 | 1.01324  |
| C3  | -3.42467 | -2.77079 | 1.44706  | C20 | 3.51629  | -2.62991 | -1.5294  | C37 | -7.41719  | -4.52907 | 0.87657  |
| C4  | -2.80824 | -2.75576 | 0.17238  | C21 | 5.1729   | -3.00661 | 0.80411  | C38 | 7.58513   | -4.33556 | -1.11811 |
| C5  | -1.38337 | -2.70511 | 0.06552  | C22 | 4.99122  | -2.68506 | -1.67131 | C39 | 8.93911   | -4.62523 | -1.23494 |
| C6  | -0.59373 | -2.71697 | 1.25909  | N23 | 5.73142  | -2.89539 | -0.48827 | C40 | 9.90158   | -3.68376 | -0.84609 |
| C7  | -3.60933 | -2.80042 | -0.99503 | O24 | 5.88172  | -3.20421 | 1.777    | C41 | 9.45862   | -2.4554  | -0.3564  |
| C8  | -3.00619 | -2.762   | -2.2405  | O25 | 5.55371  | -2.57148 | -2.74899 | C42 | 8.09365   | -2.13285 | -0.22813 |
| C9  | -1.61373 | -2.68169 | -2.35352 | C26 | -4.89796 | -2.85391 | 1.58617  | C43 | -11.21832 | -4.32245 | 0.93751  |
| C10 | -0.78218 | -2.65515 | -1.2321  | C27 | -5.08416 | -2.93797 | -0.90959 | C44 | 11.37611  | -3.99184 | -0.9602  |
| C11 | 0.87157  | -2.7666  | 1.14645  | O28 | -5.45736 | -2.8565  | 2.67104  | C45 | -7.78397  | -0.87794 | -0.16061 |
| C12 | 0.68366  | -2.59721 | -1.33978 | N29 | -5.64041 | -2.95487 | 0.38872  | S46 | -6.41231  | 0.07897  | 0.36485  |
| C13 | 1.47298  | -2.69604 | -0.14993 | O30 | -5.79482 | -3.04867 | -1.89457 | C47 | -6.95266  | 1.48057  | -0.53915 |
| C14 | 2.89791  | -2.73542 | -0.25987 | C31 | -7.05554 | -3.23179 | 0.51191  | C48 | -8.13687  | 1.20241  | -1.18842 |
| C15 | 3.69759  | -2.8873  | 0.8991   | C32 | 7.15671  | -3.10566 | -0.61931 | C49 | -8.60112  | -0.117   | -0.97128 |
| C16 | 3.09408  | -2.96752 | 2.14229  | C33 | -8.04248 | -2.2589  | 0.27002  | C50 | 7.74613   | -0.81842 | 0.33132  |
| C17 | 1.70182  | -2.89925 | 2.26121  | C34 | -9.38733 | -2.65373 | 0.42891  | C51 | 8.37096   | -0.18595 | 1.38402  |

|     |          |         |          |     |           |          |          |      |          |          |          |
|-----|----------|---------|----------|-----|-----------|----------|----------|------|----------|----------|----------|
| C52 | 7.85117  | 1.09909 | 1.67575  | C73 | 6.44531   | 3.92607  | 1.40989  | H94  | 11.63405 | -4.34158 | -1.96682 |
| C53 | 6.82347  | 1.47976 | 0.83708  | C74 | 5.46504   | 4.95208  | 1.31789  | H95  | -8.62856 | 1.91701  | -1.83916 |
| S54 | 6.50604  | 0.22021 | -0.34114 | H75 | -0.67618  | -2.68002 | 3.41285  | H96  | -9.49441 | -0.51731 | -1.43723 |
| C55 | -6.21177 | 2.72497 | -0.55765 | H76 | -3.13419  | -2.7226  | 3.55594  | H97  | 9.15707  | -0.66046 | 1.96102  |
| S56 | -4.46353 | 2.76697 | -0.52876 | H77 | -3.63414  | -2.80213 | -3.12416 | H98  | 8.19154  | 1.71232  | 2.50283  |
| C57 | -4.44038 | 4.52348 | -0.60969 | H78 | -1.18717  | -2.65843 | -3.34932 | H99  | -7.78017 | 4.21004  | -0.65249 |
| C58 | -5.73095 | 5.0321  | -0.67717 | H79 | 3.72185   | -3.08946 | 3.01851  | H100 | -3.55712 | 7.03551  | -1.7573  |
| C59 | -6.71444 | 4.00489 | -0.6481  | H80 | 1.27427   | -2.9706  | 3.25425  | H101 | -1.04785 | 7.68352  | -1.49322 |
| C60 | -3.1756  | 5.22602 | -0.61999 | H81 | 0.76853   | -2.36421 | -3.48108 | H102 | 1.21813  | 7.96381  | -0.26919 |
| C61 | -2.8473  | 6.44031 | -1.19624 | H82 | 3.22648   | -2.38664 | -3.62498 | H103 | 3.70718  | 7.31719  | 0.16329  |
| C62 | -1.48241 | 6.79011 | -1.05815 | H83 | -10.16034 | -1.90479 | 0.28645  | H104 | 7.41575  | 4.08276  | 1.86976  |
| C63 | -0.73274 | 5.85273 | -0.37461 | H84 | -9.00754  | -5.90569 | 1.30358  | C105 | 5.67523  | 6.32986  | 1.88741  |
| S64 | -1.75575 | 4.52657 | 0.14515  | H85 | -6.63227  | -5.25793 | 1.05354  | H106 | 6.04445  | 7.03405  | 1.1296   |
| C65 | 0.68568  | 5.86826 | -0.09712 | H86 | 6.8406    | -5.06924 | -1.41115 | H107 | 4.74481  | 6.7427   | 2.29087  |
| C66 | 1.54949  | 6.9462  | -0.09308 | H87 | 9.25022   | -5.58858 | -1.63139 | H108 | 6.41549  | 6.30504  | 2.69365  |
| C67 | 2.89756  | 6.59775 | 0.16587  | H88 | 10.18907  | -1.70036 | -0.0803  | C109 | -6.08616 | 6.49423  | -0.72968 |
| C68 | 3.09521  | 5.24578 | 0.38177  | H89 | -11.86988 | -3.44822 | 0.84456  | H110 | -5.38134 | 7.09974  | -0.15062 |
| S69 | 1.56368  | 4.39141 | 0.25359  | H90 | -11.41275 | -4.78505 | 1.91242  | H111 | -6.08158 | 6.87991  | -1.75825 |
| C70 | 4.31483  | 4.52211 | 0.66941  | H91 | -11.52147 | -5.04695 | 0.17096  | H112 | -7.09054 | 6.66098  | -0.32694 |
| S71 | 4.46354  | 2.83805 | 0.18598  | H92 | 11.98756  | -3.11058 | -0.74359 |      |          |          |          |
| C72 | 6.07184  | 2.71661 | 0.86243  | H93 | 11.67143  | -4.7826  | -0.2588  |      |          |          |          |

## Final Geometry:

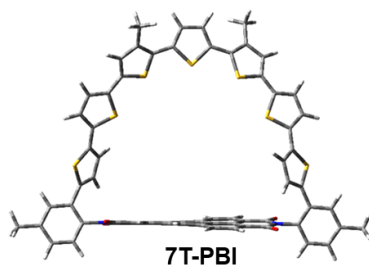

Total energy: -5811.97392424 Hartrees

|     |          |          |          |     |           |          |          |     |          |          |          |
|-----|----------|----------|----------|-----|-----------|----------|----------|-----|----------|----------|----------|
| C1  | 1.18375  | -2.92766 | -2.58157 | O25 | -5.38053  | -3.15916 | 2.94681  | C49 | 8.88351  | -1.36508 | 1.08153  |
| C2  | 2.57409  | -2.96034 | -2.73763 | C26 | 4.86274   | -3.24593 | -1.84504 | C50 | -8.0385  | -1.82887 | -0.09645 |
| C3  | 3.40055  | -3.11638 | -1.63753 | C27 | 5.13993   | -3.57124 | 0.62182  | C51 | -8.8839  | -1.3647  | -1.08103 |
| C4  | 2.83737  | -3.18241 | -0.34025 | O28 | 5.38051   | -3.15864 | -2.94688 | C52 | -8.6309  | -0.02984 | -1.4775  |
| C5  | 1.42091  | -3.10117 | -0.16897 | N29 | 5.64135   | -3.52257 | -0.69834 | C53 | -7.5901  | 0.55936  | -0.79039 |
| C6  | 0.58187  | -3.03069 | -1.32613 | O30 | 5.87676   | -3.81632 | 1.5623   | S54 | -6.91258 | -0.56941 | 0.37029  |
| C7  | 3.68254  | -3.34419 | 0.78483  | C31 | 7.01119   | -3.93662 | -0.91549 | C55 | 7.10725  | 1.91541  | 0.94315  |
| C8  | 3.13327  | -3.36602 | 2.05556  | C32 | -7.01122  | -3.93662 | 0.91524  | S56 | 5.42877  | 2.35281  | 0.68748  |
| C9  | 1.75112  | -3.2371  | 2.23472  | C33 | 8.11481   | -3.14768 | -0.54766 | C57 | 5.7377   | 4.03465  | 1.08622  |
| C10 | 0.87607  | -3.11318 | 1.15373  | C34 | 9.39904   | -3.67737 | -0.78995 | C58 | 7.06822  | 4.20908  | 1.41504  |
| C11 | -0.87609 | -3.11289 | -1.1538  | C35 | 9.60804   | -4.93225 | -1.35881 | C59 | 7.83421  | 3.02257  | 1.33515  |
| C12 | -0.58189 | -3.03096 | 1.32608  | C36 | 8.48387   | -5.69046 | -1.71295 | C60 | 4.68731  | 5.02723  | 1.07967  |
| C13 | -1.42094 | -3.10115 | 0.16891  | C37 | 7.20644   | -5.19397 | -1.49018 | S61 | 4.65689  | 6.23582  | 1.74525  |
| C14 | -2.8374  | -3.18237 | 0.34016  | C38 | -7.20641  | -5.1941  | 1.48967  | C62 | 3.46538  | 6.98871  | 1.56169  |
| C15 | -3.68257 | -3.34386 | -0.78495 | C39 | -8.4838   | -5.69069 | 1.7124   | C63 | 2.55673  | 6.33931  | 0.73605  |
| C16 | -3.1333  | -3.36544 | -2.05569 | C40 | -9.60801  | -4.93243 | 1.35849  | S64 | 3.21259  | 4.81198  | 0.16457  |
| C17 | -1.75114 | -3.23654 | -2.23482 | C41 | -9.39908  | -3.67742 | 0.7899   | C65 | -2.55656 | 6.3393   | -0.73617 |
| C18 | -1.18377 | -2.92819 | 2.58154  | C42 | -8.11488  | -3.14764 | 0.54763  | C66 | -3.46521 | 6.98862  | -1.56188 |
| C19 | -2.57411 | -2.96085 | 2.73759  | C43 | 11.00375  | -5.45961 | -1.59495 | C67 | -4.65676 | 6.23577  | -1.74527 |
| C20 | -3.40058 | -3.11661 | 1.63746  | C44 | -11.00369 | -5.45989 | 1.59457  | C68 | -4.68723 | 5.02729  | -1.07951 |
| C21 | -5.13997 | -3.57091 | -0.622   | C45 | 8.03833   | -1.82903 | 0.09666  | S69 | -3.21248 | 4.81209  | -0.16443 |
| C22 | -4.86277 | -3.24617 | 1.84495  | S46 | 6.91261   | -0.56943 | -0.37017 | C70 | -5.73768 | 4.03478  | -1.08586 |
| N23 | -5.64139 | -3.5225  | 0.69818  | C47 | 7.58992   | 0.55912  | 0.79086  | S71 | -5.42878 | 2.35288  | -0.68738 |
| O24 | -5.8768  | -3.81577 | -1.56253 | C48 | 8.63050   | -0.03026 | 1.47814  | C72 | -7.10736 | 1.91563  | -0.94264 |

|     |          |          |          |      |           |          |          |      |          |         |          |
|-----|----------|----------|----------|------|-----------|----------|----------|------|----------|---------|----------|
| C73 | -7.83434 | 3.02289  | -1.33433 | H89  | -3.02513  | -2.89044 | 3.72166  |      |          |         |          |
| C74 | -7.06828 | 4.20934  | -1.41431 | H90  | 10.25846  | -3.06268 | -0.53945 | H105 | -9.16872 | 0.47711 | -2.27096 |
| C75 | 1.22076  | 6.73541  | 0.34665  | H91  | 8.60846   | -6.67048 | -2.16681 | H106 | 7.48542  | 5.17684 | 1.67086  |
| S76 | 0.00006  | 5.51943  | 0.00042  | H92  | 6.33681   | -5.78471 | -1.76084 | H107 | 8.90175  | 2.9814  | 1.52109  |
| C77 | -1.22055 | 6.7354   | -0.34689 | H93  | -6.33674  | -5.78487 | 1.76016  | H108 | 5.45984  | 6.56199 | 2.39843  |
| C78 | -0.68275 | 7.99928  | -0.18981 | H94  | -8.60834  | -6.6708  | 2.16606  | H109 | -5.45972 | 6.56187 | -2.39848 |
| C79 | 0.68304  | 7.99928  | 0.18924  | H95  | -10.25854 | -3.06271 | 0.53959  | H110 | -8.90193 | 2.98182 | -1.51999 |
| C80 | 3.22423  | 8.30831  | 2.24499  | H96  | 11.76202  | -4.70733 | -1.35728 | H111 | -7.48548 | 5.17717 | -1.6699  |
| C81 | -3.22402 | 8.3081   | -2.2454  | H97  | 11.1448   | -5.76097 | -2.6398  | H112 | -1.26176 | 8.90549 | -0.32003 |
| H82 | 0.57359  | -2.82697 | -3.47163 | H98  | 11.20431  | -6.34276 | -0.97518 | H113 | 1.26213  | 8.90548 | 0.31922  |
| H83 | 3.02512  | -2.88972 | -3.72168 | H99  | -11.76199 | -4.70745 | 1.3575   | H114 | 3.83973  | 8.39421 | 3.14636  |
| H84 | 3.79389  | -3.49823 | 2.90579  | H100 | -11.2044  | -6.34266 | 0.97429  | H115 | 3.47871  | 9.15712 | 1.59602  |
| H85 | 1.36507  | -3.26807 | 3.24688  | H101 | -11.14456 | -5.76191 | 2.63926  | H116 | 2.17473  | 8.42286 | 2.53539  |
| H86 | -3.79392 | -3.49743 | -2.90595 | H102 | 9.16816   | 0.47653  | 2.27181  | H117 | -3.83961 | 8.39392 | -3.14672 |
| H87 | -1.3651  | -3.2673  | -3.24698 | H103 | 9.64238   | -1.99162 | 1.53671  | H118 | -2.17454 | 8.42252 | -2.53594 |
| H88 | -0.57361 | -2.82772 | 3.47162  | H104 | -9.64291  | -1.99112 | -1.53615 | H119 | -3.47835 | 9.15703 | -1.5965  |

### Final Geometry:

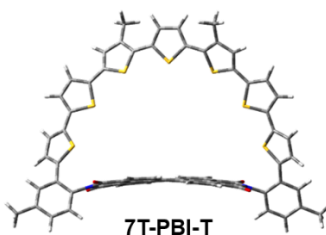

Total energy: -5811.97082142 Hartrees

|     |         |          |          |     |          |          |          |     |          |          |          |
|-----|---------|----------|----------|-----|----------|----------|----------|-----|----------|----------|----------|
| C1  | 1.56489 | -4.02077 | -2.372   | C11 | -0.6895  | -4.18215 | -1.27474 | C21 | -5.00885 | -4.25792 | -1.4249  |
| C2  | 2.96246 | -3.98392 | -2.31094 | C12 | -0.77935 | -4.11429 | 1.2218   | C22 | -5.09783 | -4.03075 | 1.06114  |
| C3  | 3.6142  | -4.0559  | -1.09167 | C13 | -1.43141 | -4.14793 | -0.05153 | N23 | -5.70481 | -4.13525 | -0.21084 |
| C4  | 2.8593  | -4.14714 | 0.10265  | C14 | -2.85997 | -4.14683 | -0.10282 | O24 | -5.61022 | -4.35913 | -2.4854  |
| C5  | 1.43074 | -4.14808 | 0.05136  | C15 | -3.52761 | -4.23565 | -1.34872 | O25 | -5.77534 | -3.9348  | 2.0706   |
| C6  | 0.77868 | -4.11437 | -1.22197 | C16 | -2.78953 | -4.31019 | -2.51778 | C26 | 5.09718  | -4.03129 | -1.06131 |
| C7  | 3.52693 | -4.23603 | 1.34855  | C17 | -1.39114 | -4.27536 | -2.47834 | C27 | 5.00816  | -4.25851 | 1.42473  |
| C8  | 2.78883 | -4.31048 | 2.5176   | C18 | -1.56554 | -4.0206  | 2.37182  | O28 | 5.7747   | -3.93548 | -2.07077 |
| C9  | 1.39046 | -4.27549 | 2.47817  | C19 | -2.96311 | -3.9836  | 2.31077  | N29 | 5.70414  | -4.13581 | 0.21068  |
| C10 | 0.68882 | -4.18222 | 1.27456  | C20 | -3.61486 | -4.05551 | 1.09149  | O30 | 5.60952  | -4.35984 | 2.48523  |



|     |           |          |          |     |          |          |          |      |           |          |          |
|-----|-----------|----------|----------|-----|----------|----------|----------|------|-----------|----------|----------|
| C31 | 7.15164   | -4.17106 | 0.24036  | S61 | 4.7988   | 6.78798  | -1.16799 | H91  | 9.63099   | -6.47522 | -0.08191 |
| C32 | -7.15231  | -4.17031 | -0.2405  | C62 | 3.66063  | 7.64255  | -1.11519 | H92  | 7.16262   | -6.30013 | 0.01438  |
| C33 | 7.91782   | -2.9951  | 0.34173  | C63 | 2.62101  | 7.08859  | -0.38064 | H93  | -7.16355  | -6.2994  | -0.01477 |
| C34 | 9.31657   | -3.11739 | 0.26115  | S64 | 3.09192  | 5.53394  | 0.28581  | H94  | -9.63194  | -6.47417 | 0.08167  |
| C35 | 9.95616   | -4.34818 | 0.1074   | C65 | -2.61985 | 7.08875  | 0.38063  | H95  | -9.91649  | -2.21373 | -0.34482 |
| C36 | 9.16261   | -5.50077 | 0.03288  | C66 | -3.6599  | 7.64348  | 1.11401  | H96  | 11.92622  | -3.4503  | 0.05903  |
| C37 | 7.77685   | -5.40832 | 0.09442  | C67 | -4.79815 | 6.78903  | 1.16691  | H97  | 11.78776  | -4.94528 | -0.87969 |
| C38 | -7.77767  | -5.4075  | -0.09466 | C68 | -4.65605 | 5.59256  | 0.49153  | H98  | 11.86462  | -5.01609 | 0.88167  |
| C39 | -9.16344  | -5.49977 | -0.03304 | S69 | -3.09039 | 5.53342  | -0.28446 | H99  | -11.92676 | -3.44892 | -0.05828 |
| C40 | -9.95684  | -4.34706 | -0.10735 | C70 | -5.55508 | 4.46277  | 0.40639  | H100 | -11.86547 | -5.01421 | -0.88187 |
| C41 | -9.3171   | -3.11634 | -0.261   | S71 | -4.99354 | 2.93566  | -0.25095 | H101 | -11.78846 | -4.94449 | 0.87952  |
| C42 | -7.91835  | -2.99423 | -0.34168 | C72 | -6.54499 | 2.167    | 0.01365  | H102 | 5.38574   | 0.60736  | 2.08204  |
| C43 | 11.46242  | -4.44105 | 0.03829  | C73 | -7.41956 | 3.0537   | 0.60905  | H103 | 6.03241   | -1.92865 | 2.24987  |
| C44 | -11.46311 | -4.43975 | -0.03817 | C74 | -6.86753 | 4.34229  | 0.82403  | H104 | -6.03314  | -1.92785 | -2.25003 |
| C45 | 7.30929   | -1.66721 | 0.52877  | C75 | 1.2583   | 7.53524  | -0.17647 | H105 | -5.38585  | 0.60777  | -2.08211 |
| S46 | 7.75334   | -0.31866 | -0.50367 | S76 | 6.19E-4  | 6.32299  | 3.87E-4  | H106 | 7.4267    | 5.16497  | -1.25596 |
| C47 | 6.71177   | 0.7822   | 0.37806  | C77 | -1.25711 | 7.53528  | 0.17651  | H107 | 8.4439    | 2.79052  | -0.85433 |
| C48 | 6.06425   | 0.11181  | 1.39563  | C78 | -0.70355 | 8.79981  | 0.09539  | H108 | 5.68728   | 7.03682  | -1.73971 |
| C49 | 6.40235   | -1.26194 | 1.48042  | C79 | 0.70469  | 8.79978  | -0.09604 | H109 | -5.68707  | 7.03862  | 1.73763  |
| C50 | -7.30965  | -1.66641 | -0.52866 | C80 | 3.59133  | 8.96346  | -1.83353 | H110 | -8.44207  | 2.79033  | 0.85857  |
| C51 | -6.40281  | -1.26118 | -1.48043 | C81 | -3.59103 | 8.96515  | 1.83098  | H111 | -7.42441  | 5.1645   | 1.26029  |
| C52 | -6.06444  | 0.1125   | -1.39555 | H82 | 1.09814  | -3.96379 | -3.3483  | H112 | -1.29485  | 9.70662  | 0.14837  |
| C53 | -6.71161  | 0.78288  | -0.37772 | H83 | 3.55684  | -3.9029  | -3.21478 | H113 | 1.29597   | 9.70657  | -0.14957 |
| S54 | -7.75322  | -0.31792 | 0.50404  | H84 | 3.3163   | -4.38958 | 3.46228  | H114 | 4.28434   | 8.983    | -2.68093 |
| C55 | 6.54547   | 2.16647  | -0.01299 | H85 | 0.85475  | -4.33103 | 3.41848  | H115 | 2.58238   | 9.15738  | -2.21278 |
| S56 | 4.99351   | 2.93474  | 0.2495   | H86 | -3.317   | -4.38922 | -3.46245 | H116 | 3.85935   | 9.79977  | -1.174   |
| C57 | 5.55602   | 4.4624   | -0.40576 | H87 | -0.85544 | -4.33098 | -3.41865 | H117 | -4.28506  | 8.98585  | 2.67751  |
| C58 | 6.86914   | 4.34232  | -0.82139 | H88 | -1.09879 | -3.96367 | 3.34813  | H118 | -3.85794  | 9.80084  | 1.17022  |
| C59 | 7.42093   | 3.05362  | -0.60644 | H89 | -3.55748 | -3.90252 | 3.21461  | H119 | -2.58247  | 9.15914  | 2.21126  |
| C60 | 4.65704   | 5.59219  | -0.49134 | H90 | 9.91607  | -2.21487 | 0.34514  |      |           |          |          |

## Final Geometry:

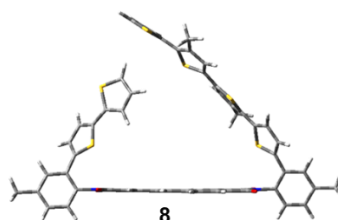

Total energy: -5261.35380099

|     |          |          |          |     |           |          |          |     |           |          |          |
|-----|----------|----------|----------|-----|-----------|----------|----------|-----|-----------|----------|----------|
| C1  | 1.77779  | -3.56593 | -2.29303 | O30 | 6.0657    | -2.74727 | 2.28862  | H59 | 12.07405  | -1.29626 | -0.09143 |
| C2  | 3.1715   | -3.45118 | -2.32148 | C31 | 7.4612    | -2.73258 | -0.03268 | H60 | 12.23936  | -2.9294  | -0.75785 |
| C3  | 3.88461  | -3.26425 | -1.15002 | C32 | -6.79659  | -3.81695 | 0.33089  | H61 | 12.17239  | -2.69239 | 0.98958  |
| C4  | 3.1975   | -3.19398 | 0.08637  | C33 | 8.02992   | -1.45133 | 0.08263  | H62 | -11.6061  | -3.38997 | 0.20464  |
| C5  | 1.7723   | -3.30329 | 0.12359  | C34 | 9.43262   | -1.35739 | 0.09741  | H63 | -11.39856 | -4.99804 | -0.50246 |
| C6  | 1.05502  | -3.49252 | -1.10052 | C35 | 10.26069  | -2.47725 | -0.0017  | H64 | -11.43897 | -4.80909 | 1.25154  |
| C7  | 3.92904  | -3.01117 | 1.28504  | C36 | 9.6585    | -3.73553 | -0.1325  | C65 | -7.11586  | -1.41118 | -0.43865 |
| C8  | 3.25904  | -2.94571 | 2.49427  | C37 | 8.2732    | -3.8588  | -0.14296 | C66 | -7.5668   | -0.65981 | -1.50014 |
| C9  | 1.86471  | -3.04605 | 2.53894  | C38 | -7.35766  | -5.04073 | 0.69086  | S67 | -5.89946  | -0.51645 | 0.45465  |
| C10 | 1.0992   | -3.21615 | 1.38369  | C39 | -8.7368   | -5.215   | 0.69718  | C68 | -6.93198  | 0.60285  | -1.62472 |
| C11 | -0.41153 | -3.5965  | -1.06285 | C40 | -9.58655  | -4.16142 | 0.33481  | H69 | -8.31143  | -1.02925 | -2.19685 |
| C12 | -0.36849 | -3.30143 | 1.4192   | C41 | -9.00948  | -2.93939 | -0.01276 | H70 | -7.13939  | 1.30295  | -2.42712 |
| C13 | -1.08573 | -3.48996 | 0.19508  | C42 | -7.61728  | -2.7324  | -0.02599 | C71 | 7.23705   | -0.21706 | 0.22203  |
| C14 | -2.51287 | -3.5711  | 0.22938  | C43 | 11.76465  | -2.33846 | 0.03378  | C72 | 7.42479   | 0.78835  | 1.14307  |
| C15 | -3.24448 | -3.76291 | -0.96786 | C44 | -11.08604 | -4.34549 | 0.323    | S73 | 5.93509   | 0.2049   | -0.87076 |
| C16 | -2.57167 | -3.87324 | -2.17214 | H45 | 1.26294   | -3.70826 | -3.23562 | C74 | 6.531     | 1.87869  | 0.99456  |
| C17 | -1.17597 | -3.78917 | -2.21525 | H46 | 3.71483   | -3.50046 | -3.25915 | H75 | 8.17651   | 0.72816  | 1.92255  |
| C18 | -1.09298 | -3.19829 | 2.60836  | H47 | 3.83652   | -2.80867 | 3.40227  | C76 | 5.64329   | 1.73272  | -0.05386 |
| C19 | -2.48953 | -3.27366 | 2.63268  | H48 | 1.38441   | -2.98366 | 3.50804  | H77 | 6.53805   | 2.75193  | 1.63823  |
| C20 | -3.20262 | -3.45837 | 1.46105  | H49 | -3.14865  | -4.02241 | -3.07854 | C78 | 0.59996   | 6.96125  | 1.37036  |
| C21 | -4.72498 | -3.85691 | -0.95741 | H50 | -0.69428  | -3.87689 | -3.18176 | S79 | 0.27428   | 5.60046  | -0.81987 |
| C22 | -4.68276 | -3.52529 | 1.52106  | H51 | -0.57846  | -3.05012 | 3.55022  | C80 | 1.72088   | 6.09309  | 1.2473   |
| C23 | -5.35448 | -3.71313 | 0.29719  | H52 | -3.03566  | -3.18602 | 3.56588  | C81 | 1.72066   | 5.29982  | 0.12044  |
| C24 | -5.37926 | -4.0502  | -1.96855 | H53 | 9.87838   | -0.36917 | 0.16951  | H82 | 2.53109   | 6.08073  | 1.96986  |
| N25 | -5.30443 | -3.41862 | 2.56672  | H54 | 10.27689  | -4.62497 | -0.22488 | C83 | 2.68977   | 4.31783  | -0.30751 |
| N26 | 5.35792  | -3.11487 | -1.21883 | H55 | 7.80792   | -4.83561 | -0.23091 | C84 | 2.88265   | 3.78004  | -1.56167 |
| O27 | 5.40592  | -2.88193 | 1.27144  | H56 | -6.69862  | -5.86012 | 0.96096  | S85 | 3.81483   | 3.6021   | 0.82769  |
| O28 | 5.97526  | -3.14502 | -2.27244 | H57 | -9.1558   | -6.17582 | 0.98582  | C86 | 3.92594   | 2.81705  | -1.64812 |
| O29 | 6.02724  | -2.9132  | 0.00416  | H58 | -9.65213  | -2.10063 | -0.26478 | H87 | 2.30274   | 4.0906   | -2.42543 |

|     |          |         |          |      |          |         |          |      |          |         |          |
|-----|----------|---------|----------|------|----------|---------|----------|------|----------|---------|----------|
| C88 | 4.55217  | 2.6122  | -0.42702 | C97  | -1.52564 | 7.51832 | 0.00979  | C106 | -3.94237 | 2.11369 | 0.20389  |
| C89 | 4.28919  | 2.14208 | -2.94587 | C98  | -2.10684 | 7.71151 | -1.22939 | S107 | -5.60674 | 3.56857 | -1.12343 |
| H90 | 5.3713   | 2.01872 | -3.05429 | S99  | -2.57528 | 8.16871 | 1.26389  | C108 | -3.38942 | 3.42587 | 0.17738  |
| H91 | 3.83952  | 1.14406 | -3.02739 | C100 | -3.36555 | 8.37298 | -1.17692 | H109 | -3.45978 | 1.26638 | 0.67963  |
| H92 | 3.92911  | 2.73147 | -3.79525 | H101 | -1.62814 | 7.40312 | -2.15258 | C110 | -4.16767 | 4.31852 | -0.50705 |
| C93 | 0.44834  | 7.91518 | 2.5273   | C102 | -3.74964 | 8.68577 | 0.09918  | H111 | -2.44451 | 3.69301 | 0.6376   |
| H94 | 0.06453  | 8.8891  | 2.20685  | H103 | -3.9521  | 8.62013 | -2.0552  | H112 | -3.98393 | 5.36942 | -0.68798 |
| H95 | -0.24158 | 7.52824 | 3.28843  | H104 | -4.64087 | 9.20447 | 0.42594  | C113 | -0.28306 | 6.83091 | 0.30834  |
| H96 | 1.41415  | 8.0772  | 3.0163   | C105 | -5.14412 | 2.00745 | -0.46278 | C114 | -5.98759 | 0.84304 | -0.64995 |

### Final Geometry:

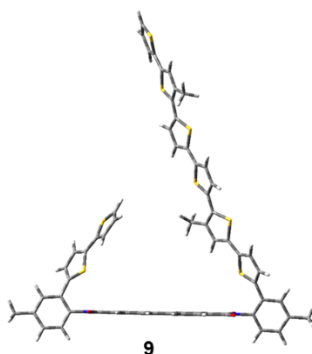

Total energy: -6364.98284625

|     |          |          |          |     |          |          |          |     |          |           |          |
|-----|----------|----------|----------|-----|----------|----------|----------|-----|----------|-----------|----------|
| C1  | -5.64751 | 1.28653  | 2.56757  | C17 | -5.72784 | -1.6738  | 2.48127  | C33 | -4.47936 | 7.74771   | 0.01882  |
| C2  | -5.61086 | 2.68441  | 2.59947  | C18 | -5.98413 | -1.52556 | -2.37019 | C34 | -4.55746 | 9.15234   | 0.01658  |
| C3  | -5.66643 | 3.41488  | 1.42516  | C19 | -6.00445 | -2.9238  | -2.40298 | C35 | -5.74193 | 9.83952   | 0.28685  |
| C4  | -5.76078 | 2.74125  | 0.18295  | C20 | -5.95298 | -3.65402 | -1.2285  | C36 | -6.88839 | 9.0901    | 0.58254  |
| C5  | -5.79479 | 1.31234  | 0.14123  | C21 | -5.85929 | -5.21152 | 1.19861  | C37 | -6.84164 | 7.70044   | 0.58592  |
| C6  | -5.73749 | 0.57728  | 1.36807  | C22 | -5.96691 | -5.13497 | -1.29893 | C38 | -7.19269 | -7.89233  | -0.23334 |
| C7  | -5.81988 | 3.49032  | -1.01744 | N23 | -5.91324 | -5.82365 | -0.07176 | C39 | -7.2924  | -9.27921  | -0.21886 |
| C8  | -5.91171 | 2.8331   | -2.23194 | O24 | -5.8423  | -5.88245 | 2.21721  | C40 | -6.14772 | -10.073   | -0.06837 |
| C9  | -5.94178 | 1.43557  | -2.28184 | O25 | -6.01446 | -5.74414 | -2.35656 | C41 | -4.91247 | -9.43266  | 0.04606  |
| C10 | -5.88395 | 0.65377  | -1.12642 | C26 | -5.615   | 4.89497  | 1.49365  | C42 | -4.78102 | -8.0325   | 0.02856  |
| C11 | -5.77276 | -0.89235 | 1.32505  | C27 | -5.79203 | 4.97295  | -1.00024 | C43 | -5.78913 | 11.34932  | 0.26247  |
| C12 | -5.90932 | -0.81604 | -1.16995 | O28 | -5.51676 | 5.50305  | 2.54838  | C44 | -6.24983 | -11.57983 | -0.03035 |
| C13 | -5.85373 | -1.55094 | 0.05697  | N29 | -5.67542 | 5.58393  | 0.26669  | C45 | -3.18762 | 7.11927   | -0.30479 |
| C14 | -5.87876 | -2.97995 | 0.01477  | O30 | -5.8661  | 5.64536  | -2.01534 | S46 | -2.44948 | 5.88031   | 0.6934   |
| C15 | -5.82852 | -3.72875 | 1.21565  | C31 | -5.65367 | 7.02927  | 0.30391  | C47 | -1.03684 | 5.79033   | -0.34431 |
| C16 | -5.75619 | -3.07139 | 2.4313   | C32 | -5.95315 | -7.26875 | -0.10711 | C48 | -1.1481  | 6.69759   | -1.3784  |

|     |          |          |          |      |          |           |          |      |          |          |          |
|-----|----------|----------|----------|------|----------|-----------|----------|------|----------|----------|----------|
| C49 | -2.35266 | 7.44483  | -1.34952 | H76  | -6.01147 | 0.96625   | -3.25583 | C103 | 11.2721  | 1.09985  | -2.54357 |
| C50 | -3.43485 | -7.45319 | 0.18175  | H77  | -5.72027 | -3.66178  | 3.34064  | H104 | 10.34637 | 0.70785  | -2.97982 |
| C51 | -2.49223 | -7.79921 | 1.1218   | H78  | -5.66868 | -1.20431  | 3.4559   | H105 | 11.11715 | 2.17103  | -2.36221 |
| C52 | -1.25549 | -7.11827 | 0.97529  | H79  | -6.02537 | -0.99731  | -3.3152  | H106 | 12.06138 | 1.00642  | -3.29575 |
| S53 | -2.77552 | -6.25854 | -0.92088 | H80  | -6.05826 | -3.45769  | -3.34578 | C107 | 1.44305  | 1.84539  | 1.71622  |
| C54 | 0.03344  | 4.86244  | -0.0592  | H81  | -3.64958 | 9.71405   | -0.18461 | H108 | 1.88244  | 1.00518  | 1.16748  |
| S55 | 1.59242  | 5.0134   | -0.84299 | H82  | -7.82336 | 9.59628   | 0.80977  | H109 | 2.09542  | 2.04951  | 2.57492  |
| C56 | 2.22104  | 3.58798  | -0.01909 | H83  | -7.73368 | 7.12046   | 0.80153  | H110 | 0.47649  | 1.51821  | 2.11154  |
| C57 | 1.26612  | 3.06014  | 0.8423   | H84  | -8.08177 | -7.27776  | -0.33581 | C111 | -0.15439 | -5.38433 | -0.54212 |
| C58 | 0.04588  | 3.78737  | 0.80324  | H85  | -8.26761 | -9.74837  | -0.32339 | C112 | 0.01018  | -4.76888 | -1.76448 |
| C59 | 3.56769  | 3.16193  | -0.32401 | H86  | -4.00872 | -10.02931 | 0.13279  | S113 | 1.19051  | -4.98965 | 0.51773  |
| C60 | 4.34068  | 3.51736  | -1.41625 | H87  | -4.78532 | 11.78072  | 0.20199  | C114 | 1.20284  | -3.99645 | -1.85799 |
| C61 | 5.63865  | 2.96152  | -1.41232 | H88  | -6.27441 | 11.74829  | 1.16076  | H115 | -0.69595 | -4.88539 | -2.57992 |
| C62 | 5.90137  | 2.16087  | -0.31674 | H89  | -6.35978 | 11.71375  | -0.60144 | C116 | 1.9465   | -4.02419 | -0.71072 |
| S63 | 4.50068  | 2.11357  | 0.74153  | H90  | -5.26564 | -12.0504  | -0.11652 | H117 | 1.4977   | -3.45026 | -2.74743 |
| C64 | 7.09677  | 1.4223   | 0.00778  | H91  | -6.7001  | -11.92259 | 0.91024  | H118 | 2.89175  | -3.53832 | -0.50962 |
| C65 | 7.30623  | 0.4947   | 1.01077  | H92  | -6.87776 | -11.95848 | -0.84509 | C119 | 14.36182 | -1.45312 | 0.60287  |
| C66 | 8.60916  | -0.04842 | 1.02419  | H93  | -0.39601 | 6.8031    | -2.15325 | C120 | 14.63237 | -1.91303 | 1.87514  |
| C67 | 9.44139  | 0.44578  | 0.03391  | H94  | -2.6228  | 8.18039   | -2.09929 | S121 | 15.73607 | -1.75432 | -0.45127 |
| S68 | 8.56534  | 1.63208  | -0.93151 | H95  | -2.69624 | -8.51419  | 1.91143  | C122 | 15.92466 | -2.49361 | 2.00882  |
| C69 | 10.82754 | 0.11311  | -0.20144 | H96  | -0.40323 | -7.27604  | 1.62798  | H123 | 13.9275  | -1.82327 | 2.69503  |
| S70 | 11.69506 | -0.77667 | 1.04906  | H97  | -0.82049 | 3.49965   | 1.39073  | C124 | 16.63935 | -2.47621 | 0.84273  |
| C71 | 12.96615 | -0.16126 | -1.09695 | H98  | 3.96768  | 4.15025   | -2.21426 | H125 | 16.30735 | -2.90183 | 2.93789  |
| C72 | 11.65931 | 0.3647   | -1.28658 | H99  | 6.35832  | 3.12564   | -2.20746 | H126 | 17.64055 | -2.84296 | 0.66109  |
| H73 | -5.60076 | 0.75808  | 3.51222  | H100 | 6.53099  | 0.19773   | 1.70929  | C127 | -1.23177 | -6.24206 | -0.08831 |
| H74 | -5.53639 | 3.21795  | 3.5411   | H101 | 8.9296   | -0.80186  | 1.7357   | C128 | 13.16733 | -0.80996 | 0.10134  |
| H75 | -5.95762 | 3.42357  | -3.14078 | H102 | 13.74856 | -0.0514   | -1.84156 |      |          |          |          |

## Final Geometry:

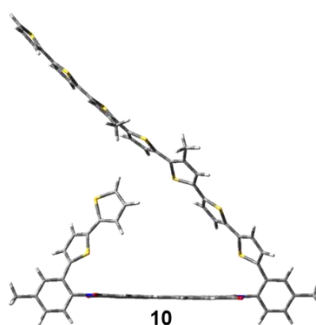

Total energy: -6916.79919220

|     |          |          |          |     |           |           |          |     |          |          |          |
|-----|----------|----------|----------|-----|-----------|-----------|----------|-----|----------|----------|----------|
| C1  | -4.76574 | -3.33627 | -2.54625 | O28 | -2.12305  | -6.62247  | -2.58872 | C55 | 11.2952  | 1.82429  | 0.32048  |
| C2  | -3.893   | -4.42814 | -2.59844 | N29 | -2.24091  | -6.85952  | -0.31483 | C56 | 11.73209 | 1.56278  | 1.60414  |
| C3  | -3.51969 | -5.08392 | -1.43828 | O30 | -2.41131  | -7.10862  | 1.95604  | C57 | 13.12616 | 1.33753  | 1.6985   |
| C4  | -4.0242  | -4.64502 | -0.18996 | C31 | -1.35809  | -8.00332  | -0.37683 | C58 | 9.95625  | 2.08509  | -0.14971 |
| C5  | -4.91071 | -3.52497 | -0.12705 | C32 | -9.98826  | 3.38333   | 0.26725  | C59 | 9.47264  | 2.08916  | -1.44118 |
| C6  | -5.28714 | -2.86475 | -1.33983 | C33 | 0.00582   | -7.89373  | -0.05293 | C60 | 8.08595  | 2.37361  | -1.56352 |
| C7  | -3.6442  | -5.32026 | 0.99541  | C34 | 0.77944   | -9.06903  | -0.09331 | C61 | 7.48337  | 2.59282  | -0.33063 |
| C8  | -4.13606 | -4.89196 | 2.21598  | C35 | 0.24522   | -10.31171 | -0.43592 | S62 | 8.66648  | 2.47517  | 0.96942  |
| C9  | -4.99736 | -3.79193 | 2.2872   | C36 | -1.11526  | -10.37901 | -0.7647  | C63 | 2.35483  | 4.1273   | -0.20716 |
| C10 | -5.39606 | -3.09089 | 1.14743  | C37 | -1.90465  | -9.23529  | -0.73123 | C64 | 1.88428  | 4.98335  | -1.1953  |
| C11 | -6.19936 | -1.71313 | -1.2751  | C38 | -11.36233 | 3.25306   | 0.4546   | C65 | 0.48088  | 5.19058  | -1.10429 |
| C12 | -6.28637 | -1.92223 | 1.21453  | C39 | -12.18297 | 4.37559   | 0.47613  | C66 | -0.14241 | 4.51718  | -0.07508 |
| C13 | -6.6646  | -1.26328 | 0.00148  | C40 | -11.64264 | 5.65651   | 0.30111  | S67 | 1.03037  | 3.56038  | 0.80684  |
| C14 | -7.52516 | -0.12329 | 0.06681  | C41 | -10.2626  | 5.77092   | 0.12396  | C68 | -1.53634 | 4.50344  | 0.29794  |
| C15 | -7.91904 | 0.54031  | -1.12058 | C42 | -9.40811  | 4.65433   | 0.10452  | S69 | -2.77789 | 5.02881  | -0.82971 |
| C16 | -7.47333 | 0.07616  | -2.34591 | C43 | 1.10822   | -11.55161 | -0.45466 | C70 | -4.05772 | 4.71028  | 0.33132  |
| C17 | -6.62511 | -1.03356 | -2.41812 | C44 | -12.53119 | 6.87834   | 0.30426  | C71 | -3.52422 | 4.20677  | 1.50086  |
| C18 | -6.77405 | -1.42437 | 2.42454  | C45 | 0.66633   | -6.64203  | 0.35224  | C72 | -2.11423 | 4.09057  | 1.48235  |
| C19 | -7.60835 | -0.30314 | 2.48044  | S46 | 0.49415   | -5.13034  | -0.52146 | C73 | 6.10929  | 2.8766   | 0.01879  |
| C20 | -7.98491 | 0.3503   | 1.31982  | C47 | 2.07725   | -5.17189  | 1.51193  | S74 | 4.97023  | 3.59848  | -1.11083 |
| C21 | -8.79859 | 1.73294  | -1.07832 | C48 | 1.55732   | -6.48616  | 1.38983  | C75 | 3.69135  | 3.66432  | 0.09491  |
| C2  | -8.84289 | 1.55519  | 1.4169   | C49 | -7.96856  | 4.87273   | -0.11906 | C76 | 4.1567   | 3.14918  | 1.29333  |
| N23 | -9.18098 | 2.18593  | 0.20297  | C50 | -7.3932   | 5.67171   | -1.08086 | C77 | 5.49812  | 2.71052  | 1.25057  |
| O24 | -9.17477 | 2.31131  | -2.0844  | C51 | -5.9762   | 5.70998   | -1.02609 | C78 | 7.38814  | 2.39292  | -2.8989  |
| O25 | -9.23192 | 2.00358  | 2.48434  | C52 | -5.44309  | 4.9425    | -0.01099 | C79 | 2.72746  | 5.6618   | -2.2439  |
| C26 | -2.58529 | -6.23186 | -1.52807 | S53 | -6.72693  | 4.1609    | 0.8939   | H80 | -5.02687 | -2.85295 | -3.48007 |
| C27 | -2.73108 | -6.48876 | 0.9554   | S54 | 12.65529  | 1.81769   | -0.7929  | H81 | -3.49296 | -4.77643 | -3.54472 |

|     |           |           |          |      |          |          |          |      |          |          |          |
|-----|-----------|-----------|----------|------|----------|----------|----------|------|----------|----------|----------|
| H82 | -3.83672  | -5.42356  | 3.11294  | H100 | 2.76048  | -4.86682 | 2.2975   | C118 | 15.19453 | 1.24272  | 0.20424  |
| H83 | -5.35232  | -3.4908   | 3.26555  | H101 | 1.79956  | -7.29376 | 2.07205  | C119 | 15.8129  | 1.01167  | -1.00704 |
| H84 | -7.78912  | 0.59468   | -3.24488 | H102 | -7.98092 | 6.19519  | -1.82698 | S120 | 16.39139 | 1.31193  | 1.48929  |
| H85 | -6.29767  | -1.3564   | -3.39909 | H103 | -5.36495 | 6.28767  | -1.71157 | C121 | 17.22677 | 0.88205  | -0.90892 |
| H86 | -6.50359  | -1.90032  | 3.35947  | H104 | 11.05948 | 1.50723  | 2.45354  | H122 | 15.26407 | 0.91711  | -1.93809 |
| H87 | -7.96782  | 0.07601   | 3.43115  | H105 | 13.62978 | 1.09158  | 2.62738  | C123 | 17.68572 | 1.01245  | 0.37303  |
| H88 | 1.83901   | -8.99017  | 0.13274  | H106 | 10.09666 | 1.86074  | -2.29966 | H124 | 17.8736  | 0.69108  | -1.75828 |
| H89 | -1.5589   | -11.33014 | -1.0485  | H107 | -0.05386 | 5.85551  | -1.77554 | H125 | 18.70402 | 0.95242  | 0.73273  |
| H90 | -2.96111  | -9.28903  | -0.97552 | H108 | -4.13407 | 3.94925  | 2.36034  | C126 | 1.89746  | -2.89222 | 0.37679  |
| H91 | -11.78386 | 2.26035   | 0.57761  | H109 | -1.53236 | 3.73597  | 2.32655  | C127 | 1.15737  | -1.9195  | -0.26054 |
| H92 | -13.25267 | 4.25512   | 0.62871  | H110 | 3.54177  | 3.09843  | 2.18549  | S128 | 3.38753  | -2.20296 | 1.00262  |
| H93 | -9.81885  | 6.75674   | 0.01605  | H111 | 6.01153  | 2.28171  | 2.10455  | C129 | 1.76772  | -0.6329  | -0.23871 |
| H94 | 2.16898   | -11.30306 | -0.35237 | H112 | 8.01667  | 1.92524  | -3.66303 | H130 | 0.19134  | -2.12014 | -0.71183 |
| H95 | 0.98154   | -12.11241 | -1.38804 | H113 | 6.43556  | 1.85302  | -2.87105 | C131 | 2.97044  | -0.6247  | 0.41293  |
| H96 | 0.84521   | -12.22981 | 0.36734  | H114 | 7.17298  | 3.41577  | -3.23401 | H132 | 1.32415  | 0.2538   | -0.67834 |
| H97 | -11.94398 | 7.80082   | 0.34518  | H115 | 2.17659  | 6.49224  | -2.69634 | H133 | 3.63673  | 0.2107   | 0.58367  |
| H98 | -13.15127 | 6.91941   | -0.60051 | H116 | 3.00543  | 4.9748   | -3.05364 | C134 | 13.7877  | 1.42269  | 0.4904   |
| H99 | -13.21319 | 6.87403   | 1.16241  | H117 | 3.6567   | 6.06276  | -1.82535 | C135 | 1.59761  | -4.2991  | 0.55912  |

### Final geometry:

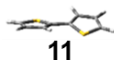

Total energy: -1104.81669881 Hartrees

|    |          |         |          |     |          |          |          |     |          |          |          |
|----|----------|---------|----------|-----|----------|----------|----------|-----|----------|----------|----------|
| C1 | 0.00000  | 3.21057 | -0.05036 | H7  | -2.27318 | 0.80799  | 0.4783   | C13 | 0.00000  | -3.21057 | -0.05036 |
| C2 | -1.26892 | 2.7657  | 0.19851  | C8  | 0.14867  | -0.71017 | 0.06763  | H14 | 2.11707  | -3.42706 | 0.33872  |
| C3 | -1.35485 | 1.34567 | 0.26702  | C9  | 1.35485  | -1.34567 | 0.26702  | H15 | -0.3497  | -4.22987 | -0.14378 |
| S4 | 1.11645  | 1.89317 | -0.22313 | S10 | -1.11645 | -1.89317 | -0.22313 | C16 | -0.14867 | 0.71017  | 0.06763  |
| H5 | 0.3497   | 4.22987 | -0.14378 | C11 | 1.26892  | -2.7657  | 0.19851  |     |          |          |          |
| H6 | -2.11707 | 3.42706 | 0.33872  | H12 | 2.27318  | -0.80799 | 0.4783   |     |          |          |          |

## Supporting References

---

- [S1] M. Zhang, H. Fan, X. Guo, Y. Yang, S. Wang, Z.-G. Zhang, J. Zhang, X. Zhan, Y. Li, *Polym. Chem.* **2011**, *49*, 2746-2754.
- [S2] M.-A. Sato, K. Fukui, *Synth. Met.* **2007**, *157*, 619-626.
- [S3] A. L. Jones, M. K. Gish, C. J. Zeman, J. M. Papanikolas, K. S. Schanze, *J. Phys. Chem. A* **2017**, *121*, 9579-9588.
- [S4] K. Bold, M. Stolte, K. Shoyama, M. Holzapfel, A. Schmiedel, C. Lambert, F. Würthner, *Angew. Chem. Int. Ed.* **2022**, *61*, e202113598; *Angew. Chem.* **2022**, *134*, e202113598.
- [S5] K. Bold, M. Stolte, F. Würthner, *Org. Mater.* **2021**, *3*, 119-127.
- [S6] N. Auerhammer, A. Schulz, A. Schmiedel, M. Holzapfel, J. Hoche, M. I. S. Röhr, R. Mitric, C. Lambert, *Phys. Chem. Chem. Phys.* **2019**, *21*, 9013-9025.
- [S7] G. M. Sheldrick, *Acta Crystallogr. A* **2008**, *64*, 112-122.
- [S8] W. Kabsch, *Acta Crystallogr. D* **2010**, *66*, 125-132.
- [S9] G. M. Sheldrick, *Acta Crystallogr. A* **2015**, *71*, 3-8.
- [S10] G. M. Sheldrick, *Acta Crystallogr. C* **2015**, *71*, 3-8.
- [S11] Gaussian 16, Revision B.01, M. J. Frisch, G. W. Trucks, H. B. Schlegel, G. E. Scuseria, M. A. Robb, J. R. Cheeseman, G. Scalmani, V. Barone, G. A. Petersson, H. Nakatsuji, X. Li, M. Caricato, A. V. Marenich, J. Bloino, B. G. Janesko, R. Gomperts, B. Mennucci, H. P. Hratchian, J. V. Ortiz, A. F. Izmaylov, J. L. Sonnenberg, D. Williams-Young, F. Ding, F. Lipparini, F. Egidi, J. Goings, B. Peng, A. Petrone, T. Henderson, D. Ranasinghe, V. G. Zakrzewski, J. Gao, N. Rega, G. Zheng, W. Liang, M. Hada, M. Ehara, K. Toyota, R. Fukuda, J. Hasegawa, M. Ishida, T. Nakajima, Y. Honda, O. Kitao, H. Nakai, T. Vreven, K. Throssell, J. A. Montgomery, Jr., J. E. Peralta, F. Ogliaro, M. J. Bearpark, J. J. Heyd, E. N. Brothers, K. N. Kudin, V. N. Staroverov, T. A. Keith, R. Kobayashi, J. Normand, K. Raghavachari, A. P. Rendell, J. C. Burant, S. S. Iyengar, J. Tomasi, M. Cossi, J. M. Millam, M. Klene, C. Adamo, R. Cammi, J. W. Ochterski, R. L. Martin, K. Morokuma, O. Farkas, J. B. Foresman, and D. J. Fox, Gaussian, Inc., Wallingford CT, **2016**.
- [S12] C. Eaborn, K. J. Odell, A. Pidcock, *J. Chem. Soc., Dalton Trans.* **1978**, 357-368.
- [S13] S. Shekhar, J. F. Hartwig, *J. Am. Chem. Soc.* **2004**, *126*, 13016-13027.
- [S14] J. M. Brown, N. A. Cooley, *Chem. Rev.* **1988**, *88*, 1031-1046.
